# Supplementary material for: The Identification of Potent, Selective, and Brain Penetrant PI5P4Kγ Inhibitors as In Vivo-Ready Tool Molecules
Source: PubMed Central journal article supplement (PMC9841522; doi:10.1021/acs.jmedchem.2c01693), 2022-12-14

## Supporting Information

### The Identification of Potent, Selective, and Brain Penetrant PI5P4K $\gamma$ Inhibitors as In Vivo-Ready Tool Molecules

Timothy P. C. Rooney,<sup>‡</sup> Gregory G. Aldred,<sup>‡</sup> Helen K. Boffey,<sup>‡</sup> Henriëtte M. G. Willems,<sup>‡</sup> Simon Edwards, Stephen J. Chawner, Duncan E. Scott, Christopher Green, David Winpenny, John Skidmore, Jonathan H. Clarke, Stephen P. Andrews\*

#### Affiliations

The ALBORADA Drug Discovery Institute, University of Cambridge, Island Research Building, Cambridge Biomedical Campus, Hills Road, Cambridge, CB2 0AH, United Kingdom

\*corresponding author: spa26@cam.ac.uk

#### Table of Contents

|                                                                      | Page |
|----------------------------------------------------------------------|------|
| Biophysical experiments                                              | S2   |
| X-ray crystallography data and kinase inhibitor similarity searching | S7   |
| Kinase selectivity screening                                         | S8   |
| Cerep selectivity screening                                          | S14  |
| ADMET experimental methods                                           | S16  |
| UPLC method parameters                                               | S17  |
| Synthetic Schemes                                                    | S18  |
| References for supporting information                                | S20  |
| NMR spectra of compounds from Table 6                                | S21  |
| HPLC traces of compounds from Table 6                                | S34  |

## Biophysical Experiments

A selection of compounds from the series was validated biophysically against the PI5P4K $\gamma$ -WT protein both by microscale thermophoresis (MST) and differential scanning fluorimetry (DSF). In the MST experiments, PI5P4K $\gamma$ -WT protein was labelled with a suitable fluorophore and compounds were titrated against the labelled-protein. The MST experiments showed a good MST response in the presence of compounds that were active in the kinetic assay and no response in titrations of compounds inactive in the kinetic assay, Figure S1 and Figure S3. In particular, compound **1** and isomers **15** and **14**, which differ by a single methyl group, gave the expected MST responses (Figure S1). A good correlation between the potencies in the kinetic and MST experiments was obtained, suggesting minimal influence of the covalently attached fluorophore. A good correlation between MST pK<sub>DS</sub> and ADP-Glo pIC<sub>50</sub>s (with PI5P4K $\gamma$ +) was also observed.

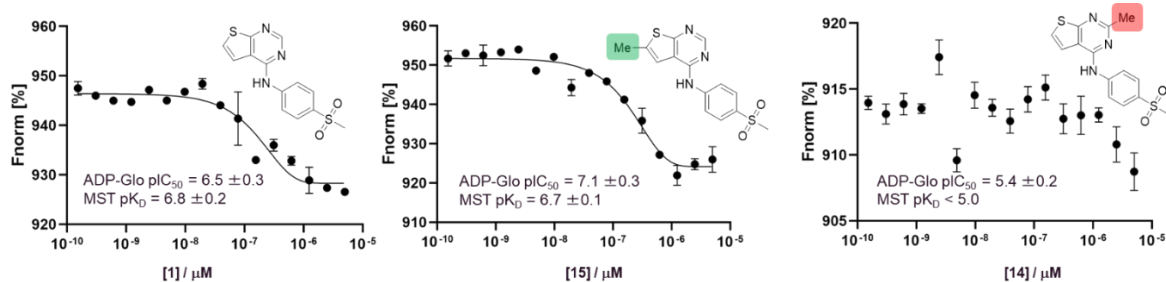

**Figure S1.** Sensitivity of the MST response to moving a methyl group is shown; MST activity is retained for active compound **15** versus **1**, which is not observed for inactive compound **14**.

An exemplar set of biophysical validation data is shown for compound **25** (Figure S2). In addition to MST data (Figure S2A-B), compound binding to PI5P4K $\gamma$  was further characterized using DSF as a label-free biophysical technique. The active compounds showed clear stabilisation of melting temperature ( $T_M$ ) of the PI5P4K $\gamma$ -WT protein with increasing concentration of **25**, Figure S2C. Further, the raw DSF titration data was fitted according to Bai *et. al.*<sup>1</sup> (Figure S2D), to provide an estimation of the pK<sub>D</sub> ( $7.3 \pm 0.2$ ), which was in good agreement with that obtained in both the kinetic assay and the MST experiment.

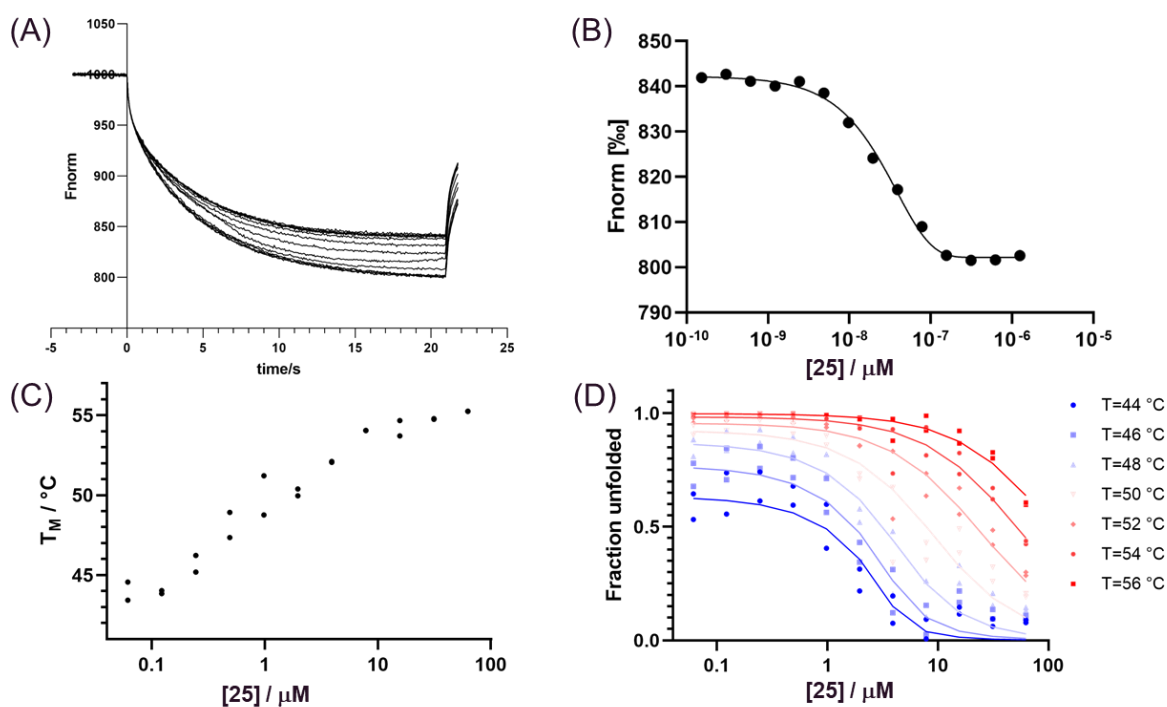

**Figure S2.** Biophysical validation of **25** binding to PI5P4K $\gamma$ -WT. (A) Raw MST response of labelled-protein in the presence of **25** and (B) the fitted data for the same titration. (C) The protein melting temperature in a DSF titration of **25** is plotted and (D) the raw data processed into an isothermal DSF plot, Bai *et. al.*<sup>1</sup>

## MST experimental

### Labelling PI5P4K $\gamma$ -WT for MST experiments

PI5P4K $\gamma$ -WT was labelled with a Monolith RED-NHS Protein Labelling Kit (NanoTemper, Cat# MO-L001) containing proprietary labelling buffer, buffer exchange column A and purification column B. Briefly, a solution of PI5P4K $\gamma$ -WT (212  $\mu\text{M}$ ) was diluted to 20  $\mu\text{M}$  with labelling buffer and buffer exchanged into labelling buffer by centrifugation (1500 g for 2 minutes, column A). The buffer-exchanged protein solution (100  $\mu\text{L}$ ) was mixed with a solution of RED-NHS dye (63  $\mu\text{M}$ , 100  $\mu\text{L}$ ) to give a 200  $\mu\text{L}$  solution with approximately 3:1 dye to protein ratio. The solution was incubated at room temperature in the dark for 30 minutes. Purification column B was equilibrated with PBS (pH 7.4) and the unreacted dye separated from the protein by passing through column B and collecting fractions. The collected fractions were assessed by MST (NanoTemper Monolith NT.115, 20% LED power) by diluting 1  $\mu\text{L}$  of each fraction 100-fold. Each fraction was also assessed by UV absorbance and

fractions were pooled that contained both significant absorbance at 280 and 650 nm. The resulting labelled protein stock PI5P4K $\gamma$  (4  $\mu$ M) was divided into 10  $\mu$ L aliquots and stored at -20 °C.

*Performing MST experiments with labelled PI5P4K $\gamma$ -WT*

An aliquot of labelled PI5P4K $\gamma$ -WT protein (4  $\mu$ L at 4  $\mu$ M) was diluted into 396  $\mu$ L MST buffer (PBS pH 7.4 with 0.05% TWEEN-20) and spun down for 10 mins at 15,000 g at 4 °C. The supernatant (~390  $\mu$ L) was collected and used in MST experiments. The protein solution (19  $\mu$ L) was mixed with a DMSO solution of the compound (1  $\mu$ L) to give the final protein concentration as 40 nM in MST buffer with 5% DMSO and equilibrated for 30 minutes at room temperature. The solution was transferred into a premium coated capillary (NanoTemper, Cat# MO-K005) and the MST signal measured with a NanoTemper Monolith NT.115 instrument running MO.Control v1.5.2 software. The temperature was controlled at 22 °C, the excitation power was between 20%-40% with either medium or high MST power for 20 seconds (see Table S1). The pre- and post-MST time was 4 seconds and 1 second respectively. The compounds were titrated in a two-fold dilution series across 16 capillaries from 5  $\mu$ M to 0.153 nM. Titration data was fitted with NanoTemper software MO.Affinity Analysis v2.2.6 to obtain the  $K_D$  (n=2). Representative MST data for compounds **14** and **45** is shown in Figure S3.

**Table S1.** MST pK<sub>DS</sub> (PI5P4K $\gamma$ -WT) compared to ADP-Glo pIC<sub>50S</sub> (PI5P4K $\gamma$ +)

| Compound  | LED power | MST power | MST analysis range | PI5P4K $\gamma$ -WT MST pK <sub>D</sub> | PI5P4K $\gamma$ + ADP-Glo pIC <sub>50</sub> |
|-----------|-----------|-----------|--------------------|-----------------------------------------|---------------------------------------------|
| <b>1</b>  | 20%       | Medium    | 4.0-5.0 s          | 6.8 $\pm$ 0.2                           | 6.5                                         |
| <b>15</b> | 40%       | Medium    | 4.0-5.0 s          | 6.7 $\pm$ 0.1                           | 7.0                                         |
| <b>25</b> | 20%       | High      | 1.5-2.5 s          | 8.2 $\pm$ 0.2                           | 7.7                                         |
| <b>14</b> | 30%       | Medium    | 4.0-5.0 s          | < 5.0                                   | 5.4                                         |
| <b>45</b> | 40%       | Medium    | 4.0-5.0 s          | 6.2 $\pm$ 0.1                           | 6.8                                         |

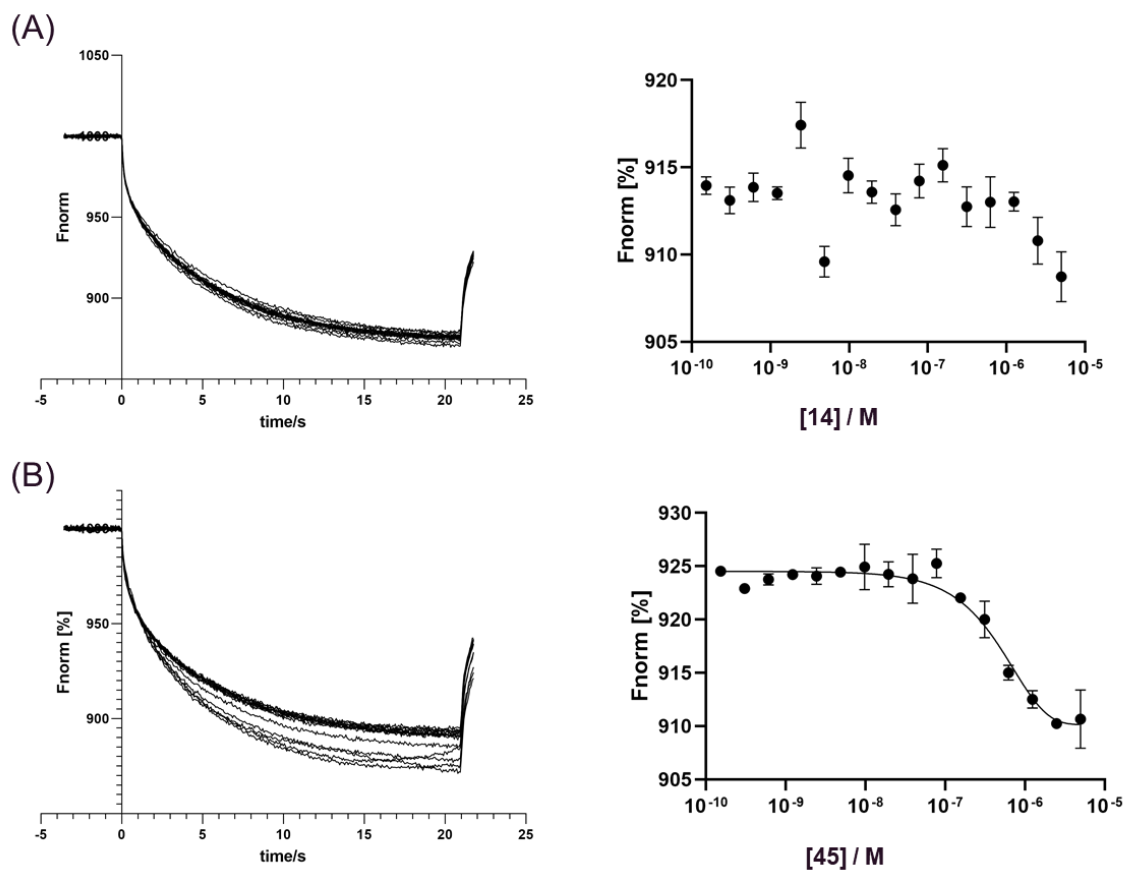

**Figure S3.** MST traces (left) and fitted data (right) for titrations of (A) inactive compound **14** and (B) active compound **45**.

### Differential Scanning Fluorimetry titrations

The DSF experiments were performed under conditions previously reported by Boffey *et al.*<sup>2</sup> Briefly, the thermal shift experiment was performed with an Applied Biosystem StepOne Real-Time PCR System in 96-well plates (Life technologies, cat. 4346906) sealed with optically clear lids (Life technologies, cat. 4360954). The final concentration of the wild-type PI5P4K- $\gamma$  protein was 4  $\mu\text{M}$  and the ligand was titrated in 2-fold dilutions from 62.5  $\mu\text{M}$  to 0.061  $\mu\text{M}$  (11 points) with DMSO-only controls. A 5000x stock solution of Sypro Orange was used (Life technologies, cat. S6650), at a final concentration of 5x. The buffer was 50 mM HEPES pH 7.4, 5 mM  $\text{MgCl}_2$ , and 100 mM NaCl with 5% DMSO in a total volume of 20  $\mu\text{L}$ . The plates were heated from 25 to 90  $^\circ\text{C}$  at a rate of 0.5  $^\circ\text{C}/\text{min}$ . The raw data was fitted using the analysis python script ‘DSF-fitting’ reported by Bai *et al.*<sup>1</sup> and the data plotted in Prism version 9.3.1. The isothermal DSF  $\text{pK}_\text{D}$  for compounds **1**, **25** and **45** were

calculated as  $6.0 \pm 0.1$ ,  $7.3 \pm 0.2$  and  $6.1 \pm 0.3$  respectively. The DSF titrations for **1** and **45** are shown in Figure S4.

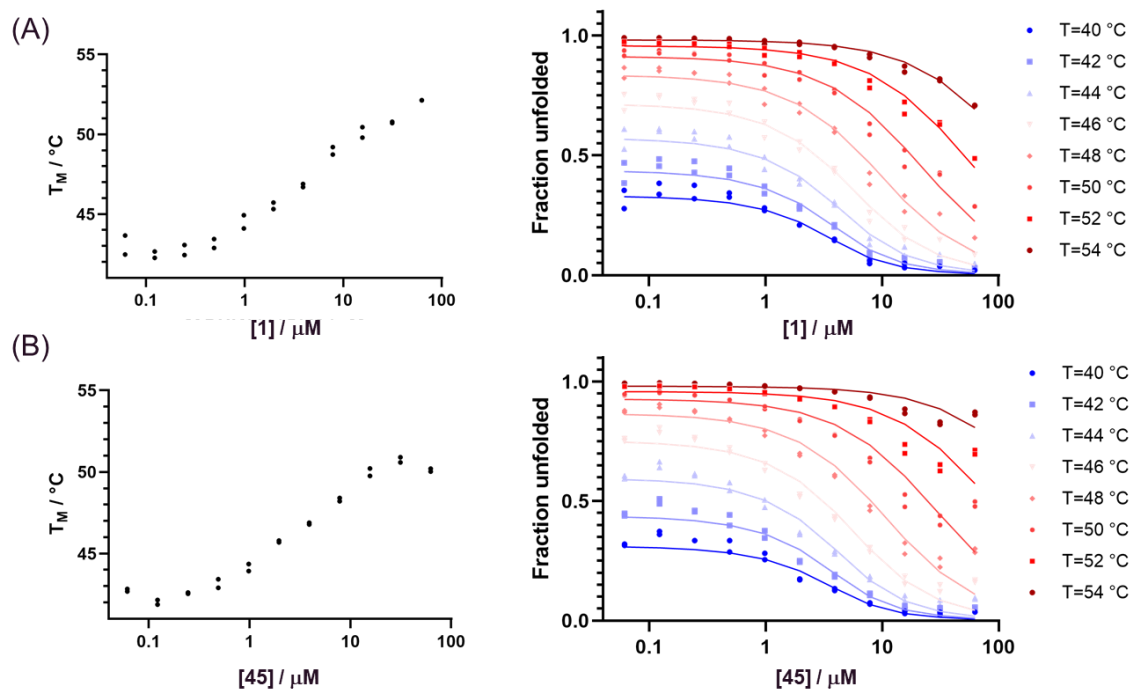

**Figure S4.** (left) PI5P4K $\gamma$ -WT melting temperature in DSF titrations and (right) raw data fitted to isothermal DSF plots (as in ref 1) for (A) **1** and (B) **45**.

**Table S2.** Data collection and refinement statistics for X-ray crystal structures of PI5P4K $\gamma$  bound to compound **15**.

|                                     |                                     |
|-------------------------------------|-------------------------------------|
| PDB ID                              | 8BQ4                                |
| Protein/Ligand                      | PI5P4K $\gamma$ /compound <b>15</b> |
| Wavelength [Å]                      | 0.97624                             |
| Space group                         | P 2 <sub>1</sub> 2 <sub>1</sub> 2   |
| Cell dimensions                     |                                     |
| a; b; c; [Å]                        | 120.01; 78.86; 96.97                |
| $\alpha$ ; $\beta$ ; $\gamma$ ; [°] | 90.0; 90.0; 90.0                    |
| Resolution [Å]                      | 2.42 (2.46-2.42) <sup>a</sup>       |
| Unique reflections                  | 35432 (1773) <sup>2</sup>           |
| Multiplicity                        | 6.4 (6.5) <sup>2</sup>              |
| Completeness [%]                    | 98.8 (100) <sup>2</sup>             |
| R <sub>sym</sub> [%]                | 7.2(260) <sup>2</sup>               |
| R <sub>meas</sub> [%]               | 7.9 (238) <sup>2</sup>              |
| Mean(I)/sd                          | 11.4 (0.6) <sup>2</sup>             |
| CC(1/2)                             | 0.999 (0.403)                       |
| Number of reflections (free)        | 35005 (1752)                        |
| R <sub>cryst</sub> [%]              | 22.2                                |
| R <sub>free</sub> [%]               | 24.7                                |
| Total number of atoms:              |                                     |
| Protein                             | 4744                                |
| Water                               | 38                                  |
| Ligand                              | 42                                  |
| Deviation from ideal geometry:      |                                     |
| Bond lengths [Å]                    | 0.01                                |
| Bond angles [°]                     | 1.12                                |

<sup>a</sup>values in parenthesis refer to the highest resolution bin.

### **Similarity Searching**

The ChEMBL database was searched for compounds similar to the novel inhibitors reported in this manuscript and hits obtained were further examined for available kinase activity in the ChEMBL database. Substructure search for **15** and **1** did not yield any hits in the ChEMBL database. The chemotype was assessed more generally by performing a similarity search in ChEMBL for **15** and **1**. There were no similarity hits for compound **15** at  $\geq 40\%$  similarity. There were 23 hits with 50-64% similarity to compound **1**. Three of these hits had reported kinase activity. ChEMBL355983 was reported to show a pIC<sub>50</sub> of 7.5 in an EGFR inhibition assay.<sup>3</sup> ChEMBL3628791 was reported to show a pIC<sub>50</sub> of 5.5 in an EGFR inhibition assay and to be inactive against KDR.<sup>4</sup> ChEMBL3628798 was tested in 9 kinase assays, and shown to inhibit KIT with a pIC<sub>50</sub> of 9, KDR, FLT4, PDGFRB and RAF1 with pIC<sub>50</sub>'s between 5 and 6, and was inactive against EGFR, MET, SRC and FLT1.<sup>4</sup> The 3 hits contain the N-phenylbenzo[b]thiophen-4-amine core, but not the sulfone substituent. Searches were performed in ChEMBL version 31 in November 2022.

**Table S3.** Kinase selectivity screening for compound **15** at 10  $\mu$ M against a general kinase panel of 140 targets in radiometric filter binding assay using  $^{33}\text{P}$ -g-ATP at the MRC PPU International Centre for Kinase Profiling, University of Dundee.

| <b>Kinase</b> | <b>% activity remaining</b> | <b>s.d.</b> |
|---------------|-----------------------------|-------------|
| MKK1          | <b>108</b>                  | 14          |
| MKK2          | <b>95</b>                   | 21          |
| MKK6          | <b>109</b>                  | 2           |
| ERK1          | <b>104</b>                  | 13          |
| ERK2          | <b>113</b>                  | 8           |
| ERK5          | <b>97</b>                   | 3           |
| JNK1          | <b>118</b>                  | 12          |
| JNK2          | <b>101</b>                  | 4           |
| JNK3          | <b>95</b>                   | 5           |
| p38a MAPK     | <b>106</b>                  | 11          |
| p38b MAPK     | <b>96</b>                   | 10          |
| p38g MAPK     | <b>102</b>                  | 4           |
| p38d MAPK     | <b>98</b>                   | 4           |
| ERK8          | <b>90</b>                   | 13          |
| RSK1          | <b>106</b>                  | 0           |
| RSK2          | <b>104</b>                  | 7           |
| PDK1          | <b>114</b>                  | 7           |
| PKBa          | <b>100</b>                  | 2           |
| PKBb          | <b>95</b>                   | 3           |
| SGK1          | <b>68</b>                   | 4           |
| S6K1          | <b>94</b>                   | 21          |
| PKA           | <b>123</b>                  | 1           |
| ROCK 2        | <b>128</b>                  | 12          |
| PRK2          | <b>99</b>                   | 2           |
| PKCa          | <b>112</b>                  | 5           |
| PKC $\gamma$  | <b>124</b>                  | 20          |
| PKCz          | <b>103</b>                  | 3           |
| PKD1          | <b>107</b>                  | 0           |
| STK33         | <b>95</b>                   | 9           |



|                |            |    |
|----------------|------------|----|
| MSK1           | <b>91</b>  | 9  |
| MNK1           | <b>91</b>  | 4  |
| MNK2           | <b>80</b>  | 0  |
| MAPKAP-K2      | <b>107</b> | 6  |
| MAPKAP-K3      | <b>93</b>  | 22 |
| PRAK           | <b>111</b> | 17 |
| CAMKKb         | <b>101</b> | 4  |
| CAMK1          | <b>109</b> | 5  |
| SmMLCK         | <b>106</b> | 8  |
| PHK            | <b>93</b>  | 2  |
| DAPK1          | <b>107</b> | 4  |
| CHK1           | <b>99</b>  | 11 |
| CHK2           | <b>83</b>  | 24 |
| GSK3b          | <b>124</b> | 7  |
| CDK2-Cyclin A  | <b>75</b>  | 3  |
| CDK9-Cyclin T1 | <b>100</b> | 17 |
| PLK1           | <b>106</b> | 3  |
| Aurora A       | <b>113</b> | 7  |
| Aurora B       | <b>31</b>  | 0  |
| TLK1           | <b>121</b> | 21 |
| LKB1           | <b>119</b> | 4  |
| AMPK (hum)     | <b>91</b>  | 3  |
| MARK1          | <b>124</b> | 18 |
| MARK2          | <b>106</b> | 8  |
| MARK3          | <b>100</b> | 27 |
| MARK4          | <b>109</b> | 6  |
| BRSK1          | <b>97</b>  | 7  |
| BRSK2          | <b>104</b> | 1  |
| MELK           | <b>101</b> | 7  |
| NUAK1          | <b>103</b> | 9  |
| SIK2           | <b>103</b> | 7  |
| SIK3           | <b>95</b>  | 1  |
| TSSK1          | <b>95</b>  | 3  |

|                |            |    |
|----------------|------------|----|
| CK1 $\gamma$ 2 | <b>94</b>  | 7  |
| CK1 $\delta$   | <b>103</b> | 2  |
| CK2            | <b>103</b> | 1  |
| TTBK1          | <b>106</b> | 11 |
| TTBK2          | <b>124</b> | 19 |
| DYRK1A         | <b>96</b>  | 3  |
| DYRK2          | <b>80</b>  | 5  |
| DYRK3          | <b>101</b> | 9  |
| NEK2a          | <b>91</b>  | 6  |
| NEK6           | <b>107</b> | 1  |
| IKKb           | <b>106</b> | 5  |
| IKKe           | <b>104</b> | 15 |
| TBK1           | <b>100</b> | 0  |
| PIM1           | <b>120</b> | 7  |
| PIM2           | <b>110</b> | 0  |
| PIM3           | <b>66</b>  | 2  |
| SRPK1          | <b>106</b> | 4  |
| EF2K           | <b>108</b> | 2  |
| EIF2AK3        | <b>102</b> | 6  |
| HIPK1          | <b>106</b> | 7  |
| HIPK2          | <b>101</b> | 3  |
| HIPK3          | <b>106</b> | 9  |
| CLK2           | <b>37</b>  | 1  |
| PAK2           | <b>124</b> | 0  |
| PAK4           | <b>110</b> | 0  |
| PAK5           | <b>116</b> | 6  |
| PAK6           | <b>94</b>  | 18 |
| MST2           | <b>108</b> | 8  |
| MST3           | <b>107</b> | 2  |
| MST4           | <b>103</b> | 22 |
| GCK            | <b>103</b> | 13 |
| MAP4K3         | <b>108</b> | 5  |
| MAP4K5         | <b>101</b> | 0  |

|        |            |    |
|--------|------------|----|
| MINK1  | <b>86</b>  | 13 |
| MEKK1  | <b>101</b> | 9  |
| MLK1   | <b>97</b>  | 8  |
| MLK3   | <b>93</b>  | 1  |
| TESK1  | <b>96</b>  | 2  |
| TAO1   | <b>111</b> | 9  |
| ASK1   | <b>112</b> | 22 |
| TAK1   | <b>109</b> | 0  |
| IRAK1  | <b>86</b>  | 6  |
| IRAK4  | <b>99</b>  | 2  |
| RIPK2  | <b>74</b>  | 1  |
| OSR1   | <b>115</b> | 2  |
| TTK    | <b>88</b>  | 6  |
| MPSK1  | <b>106</b> | 4  |
| WNK1   | <b>107</b> | 7  |
| ULK1   | <b>107</b> | 2  |
| ULK2   | <b>128</b> | 10 |
| TGFBR1 | <b>109</b> | 11 |
| Src    | <b>108</b> | 8  |
| Lck    | <b>102</b> | 3  |
| CSK    | <b>91</b>  | 7  |
| YES1   | <b>111</b> | 12 |
| ABL    | <b>98</b>  | 4  |
| BTK    | <b>111</b> | 2  |
| JAK3   | <b>103</b> | 13 |
| SYK    | <b>91</b>  | 4  |
| ZAP70  | <b>101</b> | 9  |
| TIE2   | <b>144</b> | 56 |
| BRK    | <b>90</b>  | 18 |
| EPH-A2 | <b>98</b>  | 10 |
| EPH-A4 | <b>125</b> | 21 |
| EPH-B1 | <b>107</b> | 1  |
| EPH-B2 | <b>101</b> | 13 |

|        |            |    |
|--------|------------|----|
| EPH-B3 | <b>86</b>  | 18 |
| EPH-B4 | <b>112</b> | 4  |
| FGF-R1 | <b>109</b> | 39 |
| HER4   | <b>99</b>  | 11 |
| IGF-1R | <b>124</b> | 4  |
| IR     | <b>107</b> | 11 |
| IRR    | <b>101</b> | 15 |
| TrkA   | <b>83</b>  | 21 |
| DDR2   | <b>127</b> | 0  |
| VEG-FR | <b>100</b> | 3  |
| PDGFRA | <b>99</b>  | 14 |
| PINK   | <b>111</b> | 7  |

**Table S4.** Lipid kinase selectivity screening for compound **15** at 10  $\mu$ M against a kinase panel of 15 protein kinase targets using ADP-Glo assay at the MRC PPU International Centre for Kinase Profiling, University of Dundee.

| <b>Kinase</b> | <b>% activity remaining</b> | <b>s.d.</b> |
|---------------|-----------------------------|-------------|
| PI3K a        | <b>99</b>                   | 12          |
| PI3K b        | <b>110</b>                  | 9           |
| PI3K g        | <b>91</b>                   | 6           |
| PIK4CB        | <b>71</b>                   | 23          |
| PIP5K2a       | <b>90</b>                   | 6           |
| DGK b         | <b>100</b>                  | 1           |
| SPHK2         | <b>104</b>                  | 8           |
| PI4K2a        | <b>107</b>                  | 4           |
| PI3KaE545K    | <b>91</b>                   | 1           |
| CHKb          | <b>102</b>                  | 2           |
| SPHK1         | <b>105</b>                  | 1           |
| DGK z         | <b>106</b>                  | 7           |
| DGK g         | <b>112</b>                  | 3           |
| CHKa          | <b>113</b>                  | 6           |
| PI3KaE524K    | <b>82</b>                   | 2           |

**Table S5.** Lipid kinase selectivity screening for compound **15** at 10  $\mu$ M against a kinase panel of 13 protein kinase targets generated using KINOMEscan<sup>TM</sup> technology<sup>a</sup> at DiscoverX.

| <b>Kinase</b> | <b>% activity remaining</b> |
|---------------|-----------------------------|
| PIK3C2B       | <b>68</b>                   |
| PIK3C2G       | <b>28</b>                   |
| PIK3CA        | <b>100</b>                  |
| PIK3CB        | <b>86</b>                   |
| PIK3CD        | <b>80</b>                   |
| PIK3CG        | <b>67</b>                   |
| PIK4CB        | <b>70</b>                   |
| PIKFYVE       | <b>100</b>                  |
| PIP5K1A       | <b>92</b>                   |
| PIP5K1C       | <b>24</b>                   |
| PIP5K2B       | <b>100</b>                  |
| PIP5K2C       | <b>1.9</b>                  |
| VPS34         | <b>64</b>                   |
| PIK3C2B       | <b>68</b>                   |

**Table S6.** Lipid kinase  $K_D$  data for compound **15** generated using KINOMEscan<sup>TM</sup> technology<sup>a</sup> at DiscoverX.

| <b>Kinase</b> | <b><math>K_D</math> (nM)</b> |
|---------------|------------------------------|
| PIK3C2G       | <b>&gt;3000</b>              |
| PIP5K1C       | <b>230</b>                   |
| PIP5K2C       | <b>7.1</b>                   |

<sup>a</sup> Data were generated at Eurofins Discovery using DiscoverX KINOMEscan<sup>TM</sup> technology. Streptavidin-coated magnetic beads were treated with biotinylated small molecule ligands for 30 minutes at room temperature to generate affinity resins for kinase assays. The liganded beads were blocked with excess biotin and washed with blocking buffer (SeaBlock (Pierce), 1% BSA, 0.05% Tween 20, 1 mM DTT) to remove unbound ligand and to reduce non-specific binding. Binding reactions were assembled by combining kinases, liganded affinity beads, and test compounds in 1x binding buffer (20% SeaBlock, 0.17x PBS, 0.05% Tween 20, 6 mM DTT). Test compounds were prepared as 111X stocks in 100% DMSO.  $K_D$ s were determined using an 11-point 3-fold

compound dilution series with three DMSO control points. All compounds for  $K_D$  measurements are distributed by acoustic transfer (non-contact dispensing) in 100% DMSO. The compounds were then diluted directly into the assays such that the final concentration of DMSO was 0.9%. All reactions performed in polypropylene 384-well plate. Each was a final volume of 0.02 ml. The assay plates were incubated at room temperature with shaking for 1 hour and the affinity beads were washed with wash buffer (1x PBS, 0.05% Tween 20). The beads were then re-suspended in elution buffer (1x PBS, 0.05% Tween 20, 0.5  $\mu$ M nonbiotinylated affinity ligand) and incubated at room temperature with shaking for 30 minutes. The kinase concentration in the eluates was measured by qPCR.

**Table S7.** Reaction Biology PI3KC2a  $IC_{50}$  data for compound **15** using ADP-Glo assay.

| <b>Kinase</b> | <b><math>IC_{50}</math> (nM)</b> |
|---------------|----------------------------------|
| PI3KC2a       | <b>&gt;3000</b>                  |

**Table S8.** Eurofins Discovery Services SafetyScreen™ Functional Panel for compound **15** (10 $\mu$ M): cellular functional assays.

| <b>Assay</b>    | <b>% of Control Agonist Response</b> |                          |
|-----------------|--------------------------------------|--------------------------|
|                 | <b>Agonist Effect</b>                | <b>Antagonist Effect</b> |
| A2A             | <b>-0.9</b>                          | <b>67.3</b>              |
| alpha 1A (h)    | <b>3.3</b>                           | <b>77</b>                |
| alpha 2A (h)    | <b>0.3</b>                           | <b>113.2</b>             |
| beta 1 (h)      | <b>-2.5</b>                          | <b>89.4</b>              |
| beta 2 (h)      | <b>-2.8</b>                          | <b>90.5</b>              |
| CB1 (h)         | <b>-36.5</b>                         | <b>89.2</b>              |
| CB2 (h)         | <b>-43</b>                           | <b>89.7</b>              |
| CCK1 (CCKA) (h) | <b>-0.7</b>                          | <b>104.3</b>             |
| D1 (h)          | <b>-2.3</b>                          | <b>80.7</b>              |
| D2S (h)         | <b>-3</b>                            | <b>108.8</b>             |
| ETA (h)         | <b>-1.3</b>                          | <b>106.7</b>             |
| H1 (h)          | <b>-3.8</b>                          | <b>86.8</b>              |
| H2 (h)          | <b>-0.8</b>                          | <b>106.4</b>             |
| kappa (KOP) (h) | <b>-1.6</b>                          | <b>86.1</b>              |
| M1 (h)          | <b>0.5</b>                           | <b>77.7</b>              |
| M2 (h)          | <b>2.2</b>                           | <b>82.7</b>              |

|                 |             |              |
|-----------------|-------------|--------------|
| M3 (h)          | <b>3.6</b>  | <b>68.1</b>  |
| delta (DOP) (h) | <b>-0.4</b> | <b>102.4</b> |
| mu (MOP) (h)    | <b>32.5</b> | <b>88.7</b>  |
| 5-HT1A (h)      | <b>-2.1</b> | <b>105.4</b> |
| 5HT1B (h)       | <b>19.2</b> | <b>99.6</b>  |
| 5-HT2A (h)      | <b>-2</b>   | <b>103.6</b> |
| 5-HT2B (h)      | <b>-6.5</b> | <b>92.1</b>  |
| V1a (h)         | <b>15.4</b> | <b>81.4</b>  |

**Table S9.** Eurofins Discovery Services SafetyScreen™ Functional Panel for compound **15** (10µM): enzyme and cell-based assays.

| <b>Assay</b>             | <b>% of Control Values</b> |
|--------------------------|----------------------------|
| COX1(h)                  | <b>88.4</b>                |
| COX2(h)                  | <b>82.6</b>                |
| PDE3A (h)                | <b>95.9</b>                |
| PDE4D2 (h)               | <b>90.2</b>                |
| Lck kinase (h)           | <b>107.7</b>               |
| acetylcholinesterase (h) | <b>95.2</b>                |
| MAO-A (h)                | <b>64.5</b>                |
| norepinephrine uptake    | <b>81.3</b>                |
| dopamine uptake          | <b>40.9</b>                |
| 5-HT uptake              | <b>98.4</b>                |

**Table S10.** Eurofins Discovery Services SafetyScreen™ Functional Panel for compound **15** (10µM): Ion channel targets.

| <b>Assay</b>                                           | <b>Normalised % Inhibition<sup>a</sup></b> | <b>Normalised peak current<sup>b</sup></b> |
|--------------------------------------------------------|--------------------------------------------|--------------------------------------------|
| Nav 1.5                                                | <b>0.4</b>                                 | -                                          |
| Cav 1.2                                                | <b>-4.2</b>                                | -                                          |
| KCNQ1/minK                                             | <b>-15.9</b>                               | -                                          |
| hERG                                                   | <b>12.2</b>                                | -                                          |
| GABA A $\alpha$ 1 $\beta$ 2g2 (+EC <sub>20</sub> GABA) | -                                          | <b>95.6</b>                                |
| hnAChR $\alpha$ 4 $\beta$ 2                            | -                                          | <b>7.0</b>                                 |

<sup>a</sup>IonWorks Quattro and <sup>b</sup>IonFlux HT electrophysiological platforms.

## **ADMET experimental methods**

**MDR1-MDCK Permeability (bi-directional):** was performed by Cyprotex Discovery. Briefly, compounds were administered at 10  $\mu$ M (1% DMSO final) to the apical or basolateral side of a confluent monolayer of MDR1-MDCK cells, then incubated at 37 °C for 60 minutes before appearance on the opposite side of the monolayer was determined LC-MS/MS. The efflux ratio (ER) is calculated from the ratio of B-A to A-B permeabilities.

**Turbidimetric aqueous solubility:** analysis was performed by Cyprotex Discovery. Compound in DMSO at 10 mM was serially diluted to solutions of 0.1, 0.3, 1 and 3 mM in DMSO, then further diluted 1 in 100 in buffer (0.01 M PBS, pH 7.4, 1% DMSO final). 7 replicate wells of each dilution were equilibrated for 2 hours at 37 °C before absorbance is measured at 620 nm. The solubility is estimated from the concentration of test compound that produces an increase in absorbance above vehicle control (1% DMSO in buffer).

**Mouse Microsomal stability:** analysis was performed by Cyprotex Discovery. Briefly, test compounds in DMSO were incubated at a concentration of 1  $\mu$ M (0.25% DMSO final) with mouse hepatic microsomes (0.5 mg protein/mL) in the presence of NADPH (1 mM) at 37 °C. Aliquots were taken at time intervals (0, 5, 15, 30 and 45 min) and stopped by transferring into acetonitrile, then analysed using generic LC-MS/MS conditions for compound remaining, allowing the determination of the half-life for the compound.

**Plasma Protein Binding:** analysis was performed by Cyprotex Discovery. Briefly, solutions of test compound (0.5% final DMSO concentration) were prepared in 100% mouse plasma. The plasma solution was added to one side of an equilibrium dialysis system while buffer (pH 7.4) was added to the other. Compound concentration on both sides of the membrane was measured by LC-MS/MS and, by comparison to a set of calibration standards (protein-free and protein-containing solutions), the fraction of bound compound was calculated.

**Brain Protein Binding:** analysis was performed by Shanghai ChemPartner. Briefly, solutions of test compound (1  $\mu$ M, 0.2% final DMSO concentration) were incubated with 33% CD-1 mouse brain homogenate (w/v) in 50 mM sodium phosphate buffer, pH 7.4). Aliquots of the brain tissue spiked test compounds were applied to the donor side of a dialysis chamber and buffer applied to the other. The dialysis block was incubated for 5 hr at 37 °C, then samples taken for LC-MS/MS analysis.

**In vivo pharmacokinetic parameters:** were determined in a 4 in 1 cassette study by Shanghai ChemPartner. Briefly, a dosing solution of the 4 test compounds each at 1 mg/mL was prepared using the formulation 10% DMSO, 10% NMP, 40% PEG400, 20% PG, 20% (20% HP- $\beta$ -CD in water). Male CD1 mice (n=12), aged 6 to 8



weeks, were purchased from Jihui Laboratory Animal Co. LTD, Qualification No.: SCXK (SH) 20170012 20170012023814. Administration was at 5 mL/kg *via* intraperitoneal injection to achieve a dose of 5 mg/kg for each compound. Plasma samples were taken at 8 time points (0.083, 0.25, 0.5, 1, 2, 4, 8 and 24 hr post dose) and brain sampling performed at 3 time points (0.5, 2 and 8 hr post dose). Bioanalysis of compound concentration was measured by LC-MS/MS by comparison to a set of calibration standards.

All animal experiments reported in the manuscript were conducted in compliance with local guidelines and legislation in an AAALAC accredited animal facility.

**Unbound brain partition coefficient ( $K_{pu,u}$ ):** was determined as a ratio of free brain to free plasma concentrations at 0.5 hr. Free concentrations were calculated using the total concentration in each compartment determined in the *in vivo* PK study, and adjusted using the tissue specific binding level determined *in vitro*.

## UPLC methods

**Table S11.** UPLC method parameters

| Method | Column                                  | Additive                | Flow rate  | Gradient (time, %MeCN in H <sub>2</sub> O)                                     |
|--------|-----------------------------------------|-------------------------|------------|--------------------------------------------------------------------------------|
| A      | BEH C18 (130 Å, 1.7 μm, 2.1 mm × 50 mm) | 10 mM NH <sub>3</sub>   | 0.6 mL/min | 0 min, 5%; 0.8 min, 5%; 3.3 min, 95%; 4.3 min, 95%; 4.5 min, 5%; 5.5 min, 5%.  |
| B      | BEH C18 (130 Å, 1.7 μm, 2.1 mm × 50 mm) | 1 mM NH <sub>3</sub>    | 0.6 mL/min | 0 min, 5%; 0.8 min, 5%; 3.3 min, 95%; 4.3 min, 95%; 4.5 min, 5%; 5.5 min, 5%.  |
| C      | HSS C18 (100 Å, 1.8 μm, 2.1 mm × 50 mm) | 0.1% HCO <sub>2</sub> H | 0.6 mL/min | 0 min, 5%; 0.8 min, 5%; 3.3 min, 95%; 4.3 min, 95%; 4.5 min, 5%; 5.5 min, 5%.  |
| D      | BEH C18 (130 Å, 1.7 μm, 2.1 mm × 50 mm) | 10 mM NH <sub>3</sub>   | 0.6 mL/min | 0 min, 5%; 0.8 min, 5%; 8.3 min, 95%; 9.3 min, 95%; 9.5 min, 5%; 10.5 min, 5%. |
| E      | BEH C18 (130 Å, 1.7 μm, 2.1 mm × 50 mm) | 1 mM NH <sub>3</sub>    | 0.6 mL/min | 0 min, 5%; 0.8 min, 5%; 8.3 min, 95%; 9.3 min, 95%; 9.5 min, 5%; 10.5 min, 5%. |
| F      | HSS C18 (100 Å, 1.8 μm, 2.1 mm × 50 mm) | 0.1% HCO <sub>2</sub> H | 0.6 mL/min | 0 min, 5%; 0.8 min, 5%; 8.3 min, 95%; 9.3 min, 95%; 9.5 min, 5%; 10.5 min, 5%. |

### Synthetic Schemes:

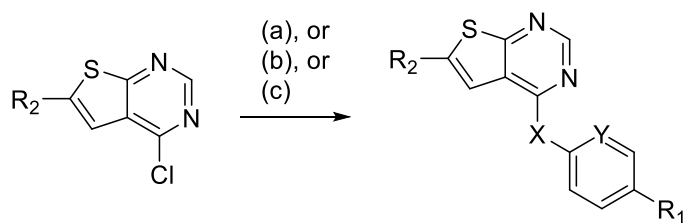

**Scheme S1.** Reagents and conditions: (a)  $R-NH_2$ , HCl, dioxane, 100 °C. (b)  $R-NH_2$ , IPA, 120 °C. (c)  $R-NH_2$ ,  $CS_2CO_3$ , Xantphos,  $Pd_2(dba)_3$ , 100 to 130 °C.

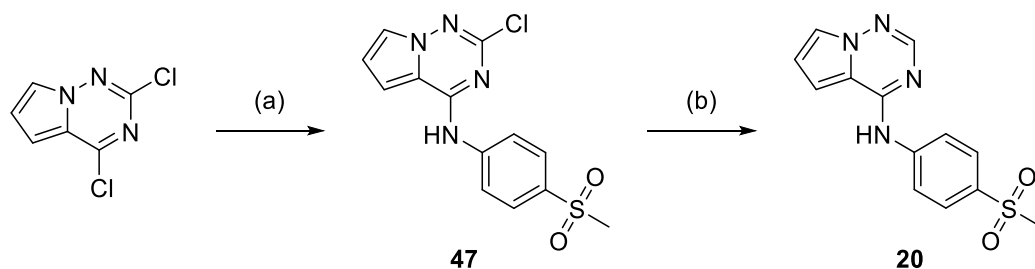

**Scheme S2.** Reagents and conditions: (a) 4-(methylsulfonyl)aniline, IPA, 120 °C. (b)  $H_2$ , Pd/C, EtOH, rt.

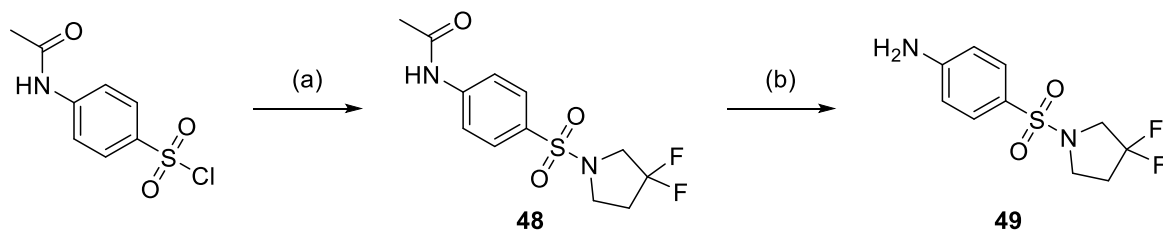

**Scheme S3.** Reagents and conditions: (a) 3,3-Difluoropyrrolidine.HCl,  $NEt_3$ , DCM, rt. (b) HCl, MeOH,  $H_2O$ , 85 °C.

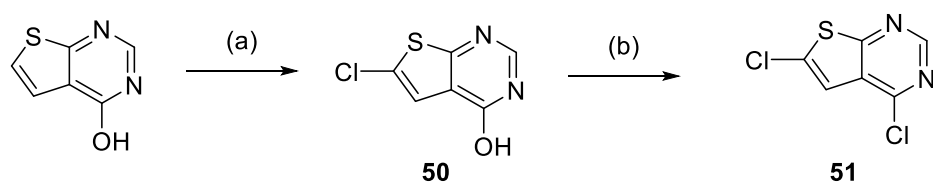

**Scheme S4.** Reagents and conditions: (a) NCS, CH<sub>3</sub>CO<sub>2</sub>H, 90 °C. (b) POCl<sub>3</sub>, toluene, 100 °C.

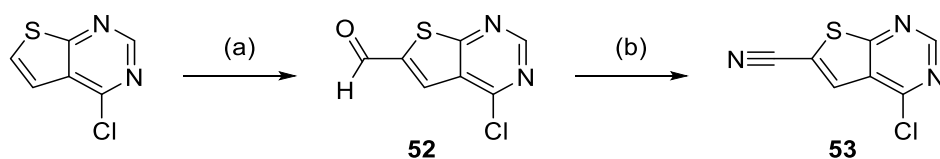

**Scheme S5.** Reagents and conditions: (a) DMF, NH<sup>t</sup>Pr<sub>2</sub>, <sup>n</sup>BuLi, THF, -78 °C. (b) Ethyl *N*-(mesitylsulfonyl)oxyacetimidate, TfOH, DCM, rt.

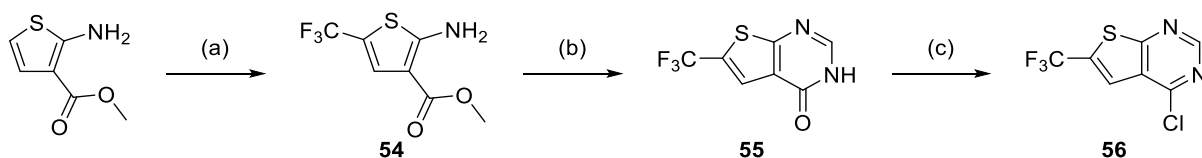

**Scheme S6.** Reagents and conditions: (a) Ru(BPY)<sub>3</sub>, MeCN, TMEDA, CF<sub>3</sub>I, LEDs. (b) HN=CHNH<sub>2</sub>, IPA, 120 °C. (c) POCl<sub>3</sub>, 100 °C.

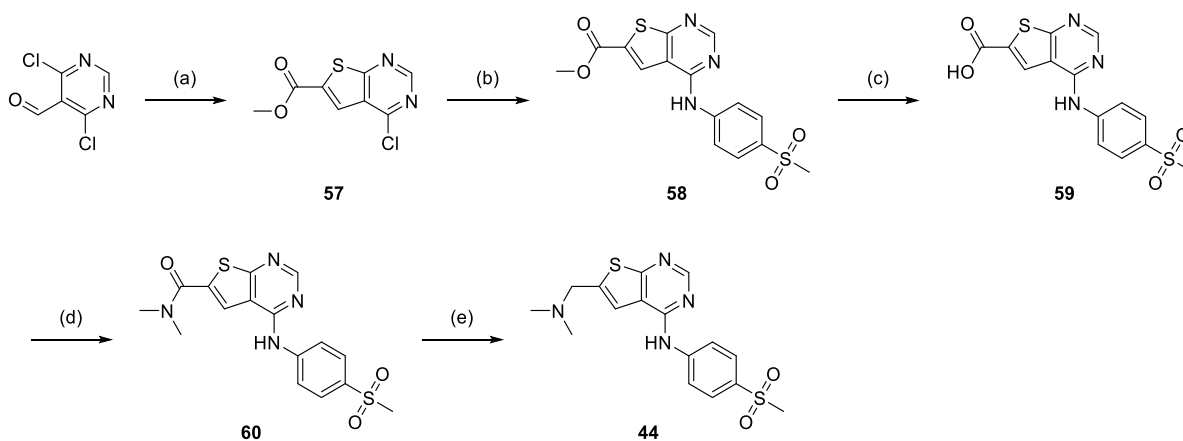

**Scheme S7.** Reagents and conditions: (a) HSCH<sub>2</sub>CO<sub>2</sub>CH<sub>3</sub>, DIPEA, DCM, -80 °C to rt. (b) 4-(methylsulfonyl)aniline, dioxane, 120 °C. (c) LiOH, MeOH, THF, H<sub>2</sub>O, rt. (d) HNMe<sub>2</sub>, HATU, DIPEA, DMF, rt. (e) LiAlH<sub>4</sub>, THF, 0 °C.

## References for Supporting Information

- (1) Bai, N., Roder, H., Dickson, A., Karanicolas, J., Isothermal Analysis of ThermoFluor Data can readily provide Quantitative Binding Affinities. *Sci Rep*, **2019**, *9*, 2650.
- (2) Boffey, H. K., Rooney, T. P. C., Willems, H. M. G., Edwards, S., Green, C., Howard, T., Ogg, D., Romero, T., Scott, D. E., Winpenny, D., Duce, J., Skidmore, J., Clarke, J. H., Andrews, S. P. Development of Selective Phosphatidylinositol 5-Phosphate 4-Kinase  $\gamma$  inhibitors with a Non-ATP-Competitive, Allosteric Binding Mode. *J Med Chem* **2022**, *65* (4), 3359–3370.
- (3) Showalter, H. D. H., Bridges, A. J., Zhou, H., Sercel, A. D., McMichael, A., Fry, D. W. Tyrosine Kinase Inhibitors. 16. 6,5,6-Tricyclic Benzothieno[3,2-*d*]pyrimidines and Pyrimido[5,4-*b*]- and -[4,5-*b*]indoles as Potent Inhibitors of the Epidermal Growth Factor Receptor Tyrosine Kinase *J. Med Chem*, **1999**, *42* (26), 5464-5474.
- (4) Ravez, S., Arsenlis, S., Barczyk, A., Dupont, A., Frédérick, R., Hesse, S., Kirsch, G., Depreux, P., & Goossens, L. Synthesis and biological evaluation of di-aryl urea derivatives as c-Kit inhibitors. *Bioorg. Med. Chem.*, **2015**, *23*(22), 7340–7347.

## NMR Spectra of compounds from Table 6

Compound 1: (Insufficient material for <sup>13</sup>C spectrum)

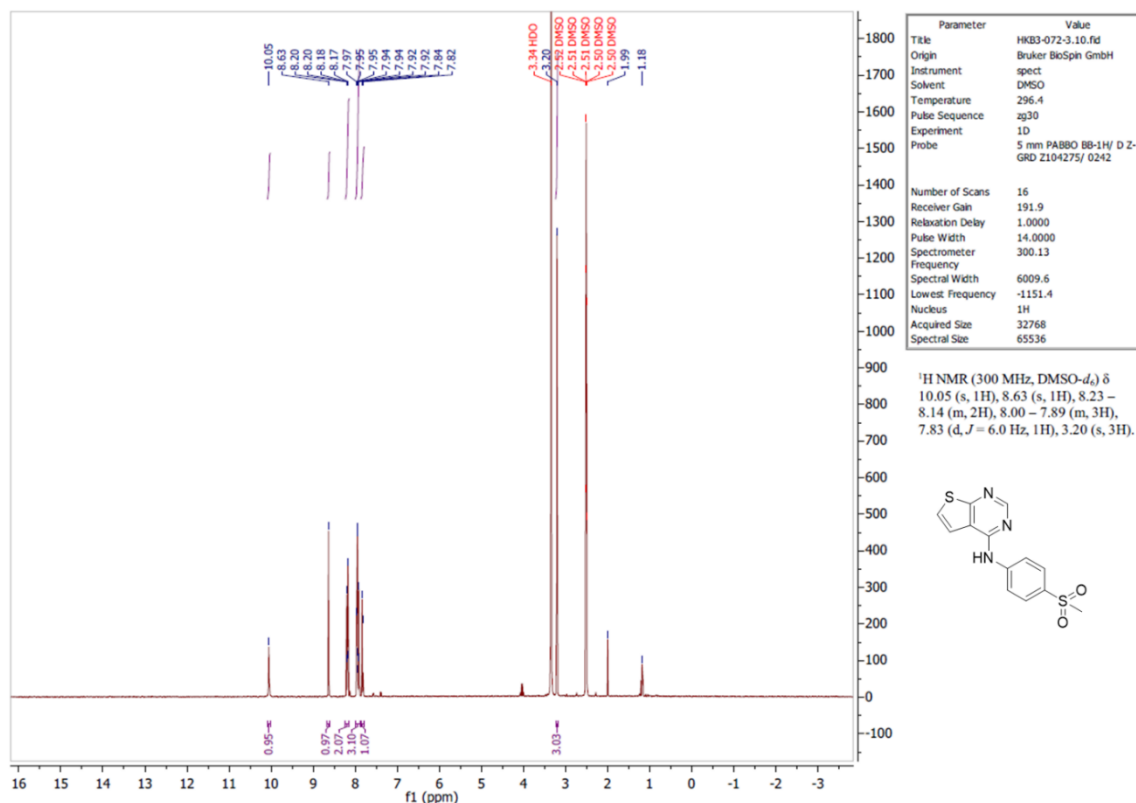

Compound 7: (Insufficient material for <sup>13</sup>C spectrum)

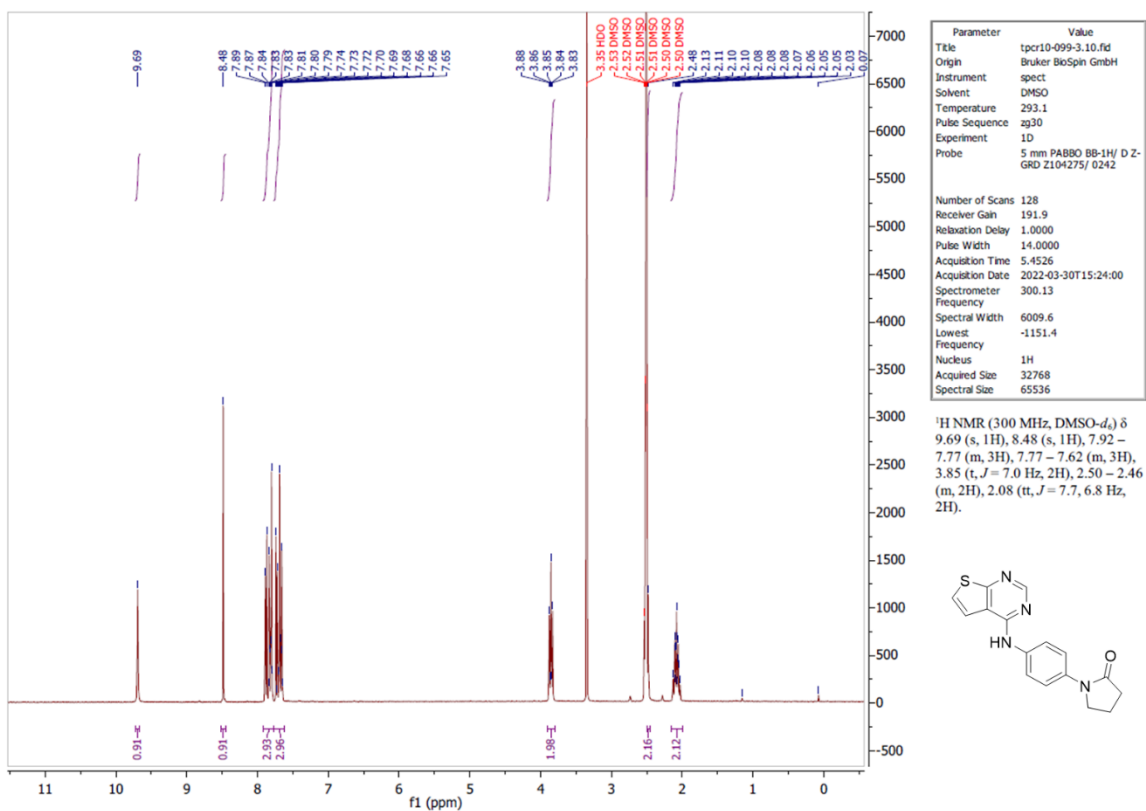

Compound 15

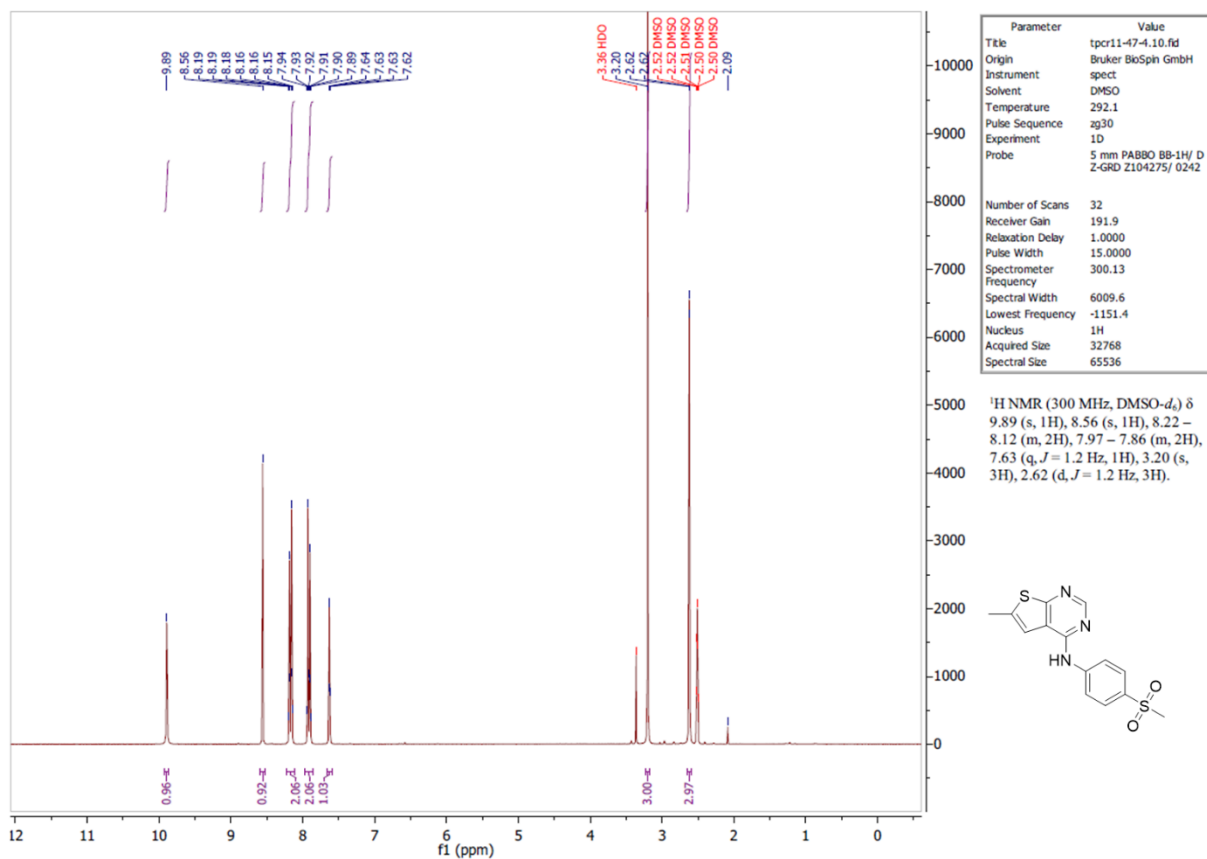

| Parameter        | Value                                   |
|------------------|-----------------------------------------|
| Title            | tpcr11-47-4.10.fid                      |
| Origin           | Bruker BioSpin GmbH                     |
| Instrument       | spect                                   |
| Solvent          | DMSO                                    |
| Temperature      | 292.1                                   |
| Pulse Sequence   | zg30                                    |
| Experiment       | 1D                                      |
| Probe            | 5 mm PABBO BB-1H/ D 2-GRD Z104275/ 0242 |
| Number of Scans  | 32                                      |
| Receiver Gain    | 191.9                                   |
| Relaxation Delay | 1.0000                                  |
| Pulse Width      | 15.0000                                 |
| Spectrometer     | 300.13                                  |
| Frequency        | 6099.6                                  |
| Spectral Width   | 6099.6                                  |
| Lowest Frequency | -1151.4                                 |
| Nucleus          | 1H                                      |
| Acquired Size    | 32768                                   |
| Spectral Size    | 65536                                   |

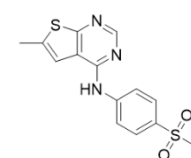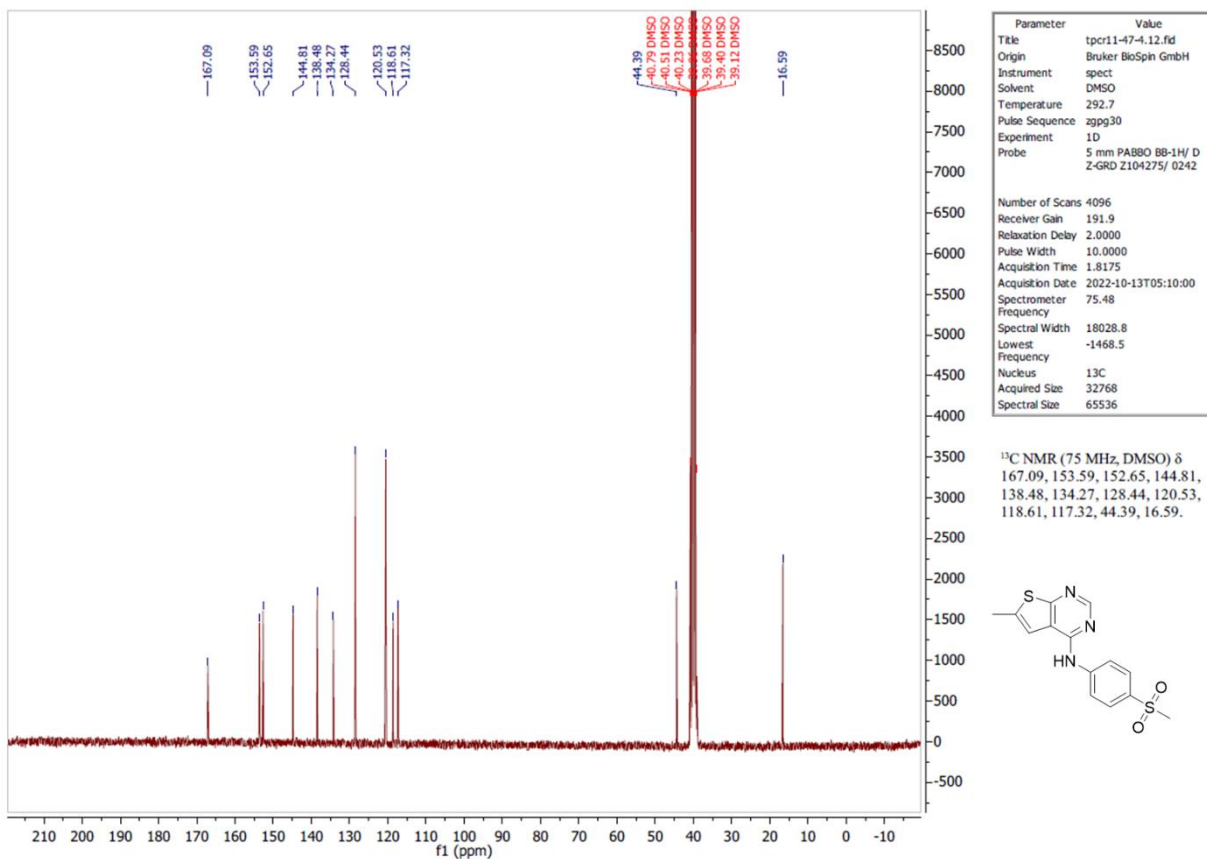

| Parameter        | Value                                   |
|------------------|-----------------------------------------|
| Title            | tpcr11-47-4.12.fid                      |
| Origin           | Bruker BioSpin GmbH                     |
| Instrument       | spect                                   |
| Solvent          | DMSO                                    |
| Temperature      | 292.7                                   |
| Pulse Sequence   | zgpg30                                  |
| Experiment       | 1D                                      |
| Probe            | 5 mm PABBO BB-1H/ D 2-GRD Z104275/ 0242 |
| Number of Scans  | 4096                                    |
| Receiver Gain    | 191.9                                   |
| Relaxation Delay | 2.0000                                  |
| Pulse Width      | 10.0000                                 |
| Acquisition Time | 1.8175                                  |
| Acquisition Date | 2022-10-13T05:10:00                     |
| Spectrometer     | 75.48                                   |
| Frequency        | 18028.8                                 |
| Spectral Width   | 18028.8                                 |
| Lowest Frequency | -1468.5                                 |
| Nucleus          | 13C                                     |
| Acquired Size    | 32768                                   |
| Spectral Size    | 65536                                   |

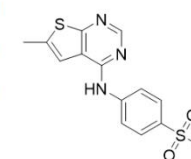

Compound 23

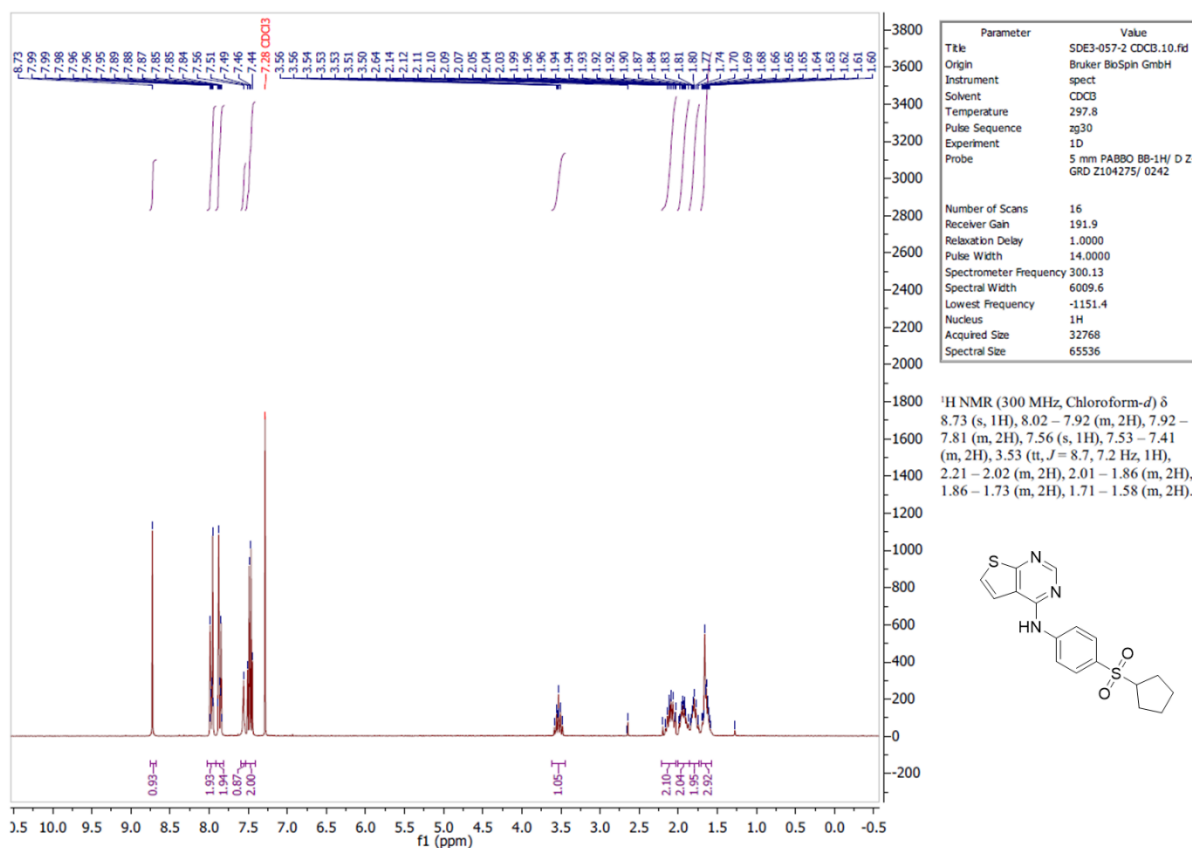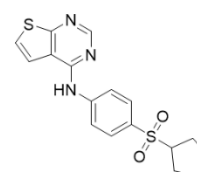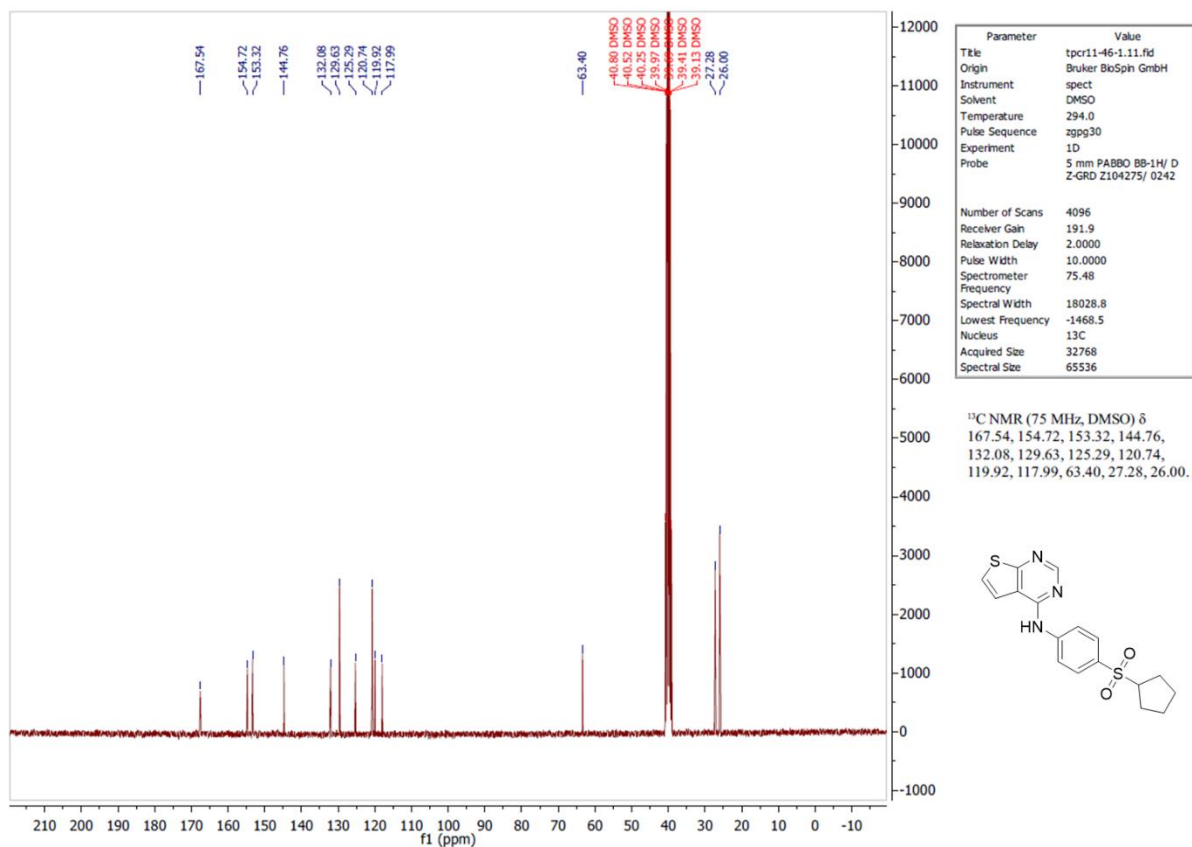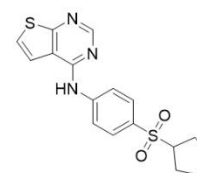

Compound 24

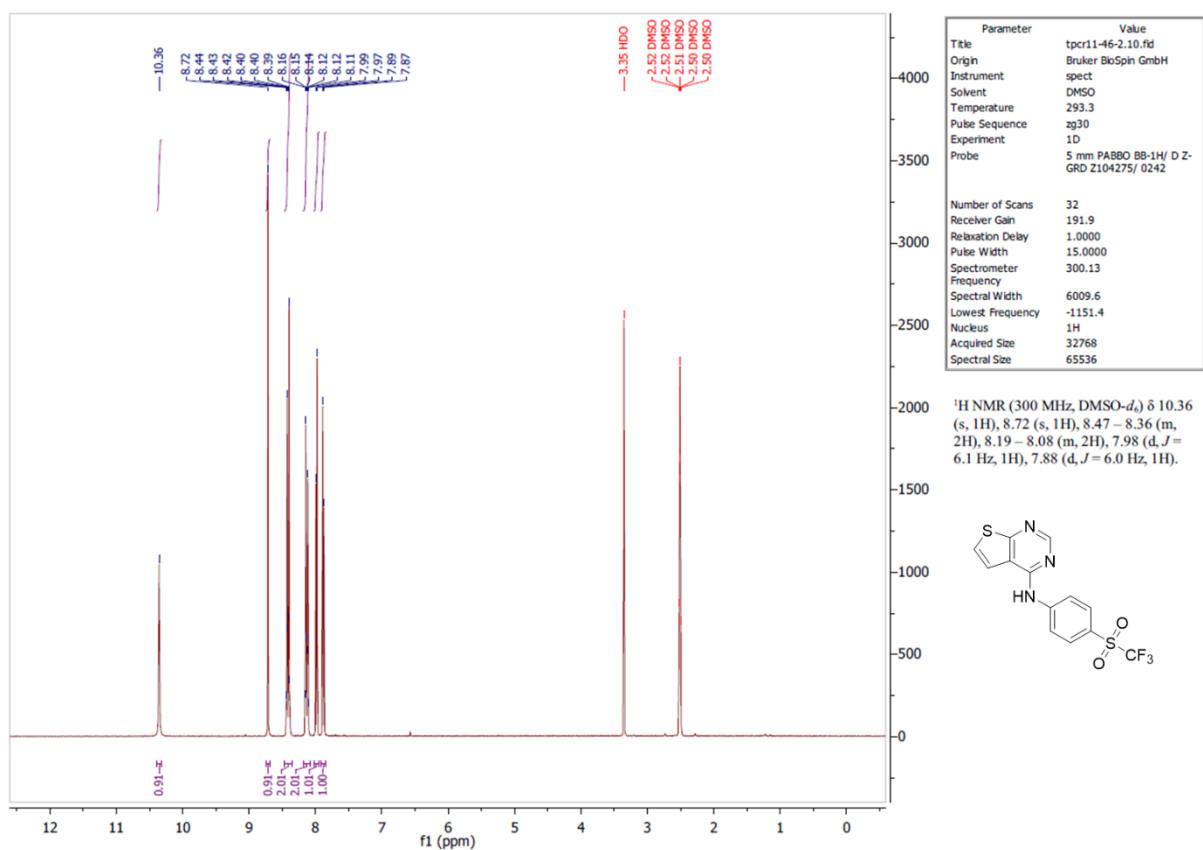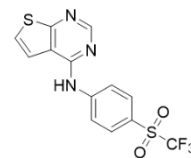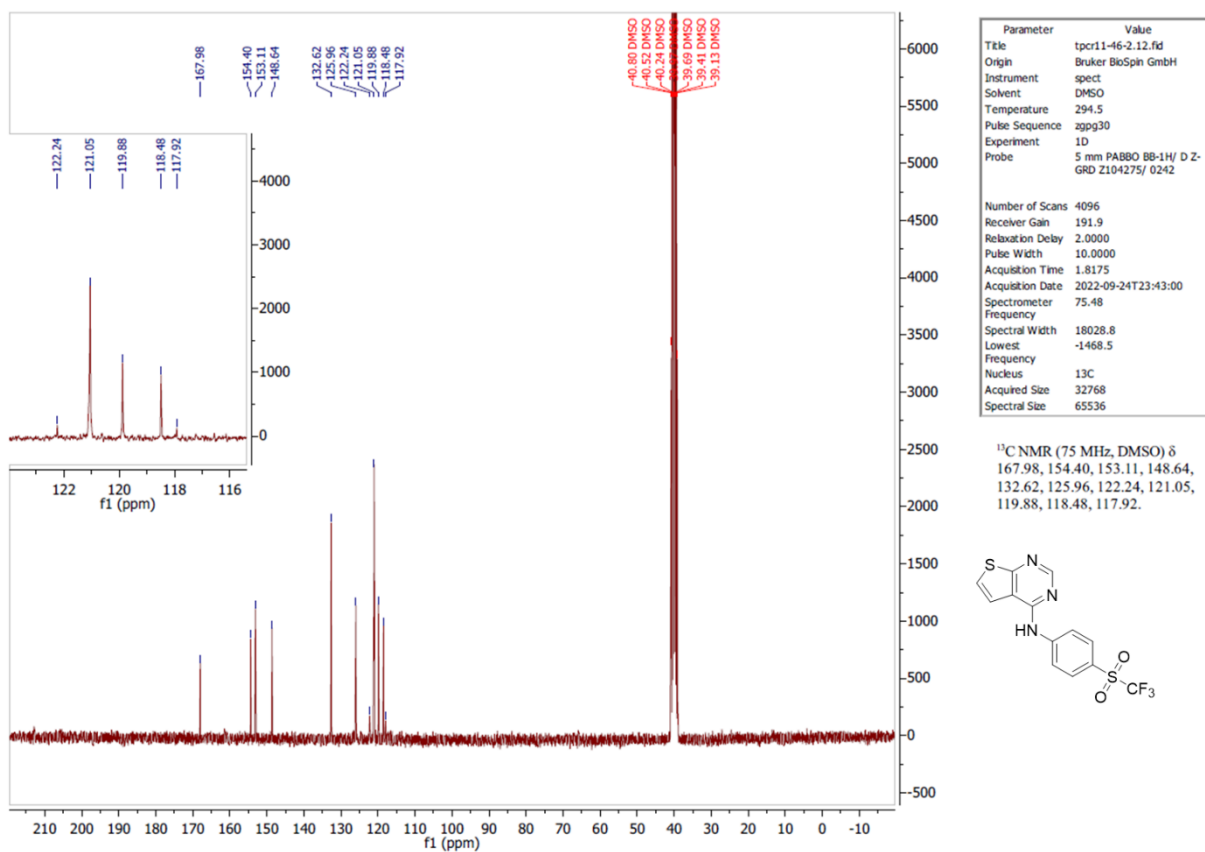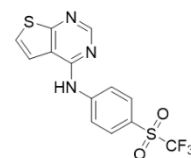



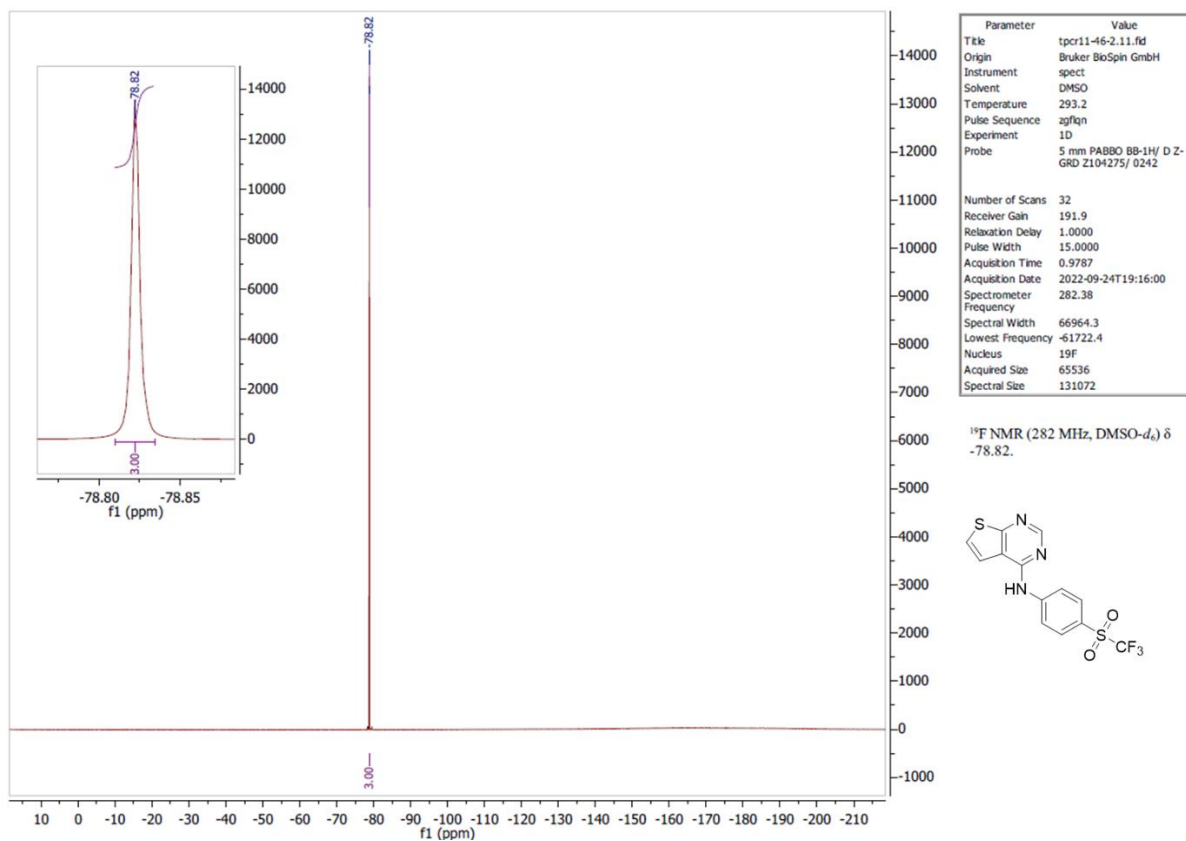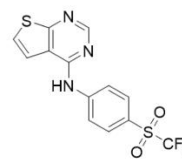

Compound 35

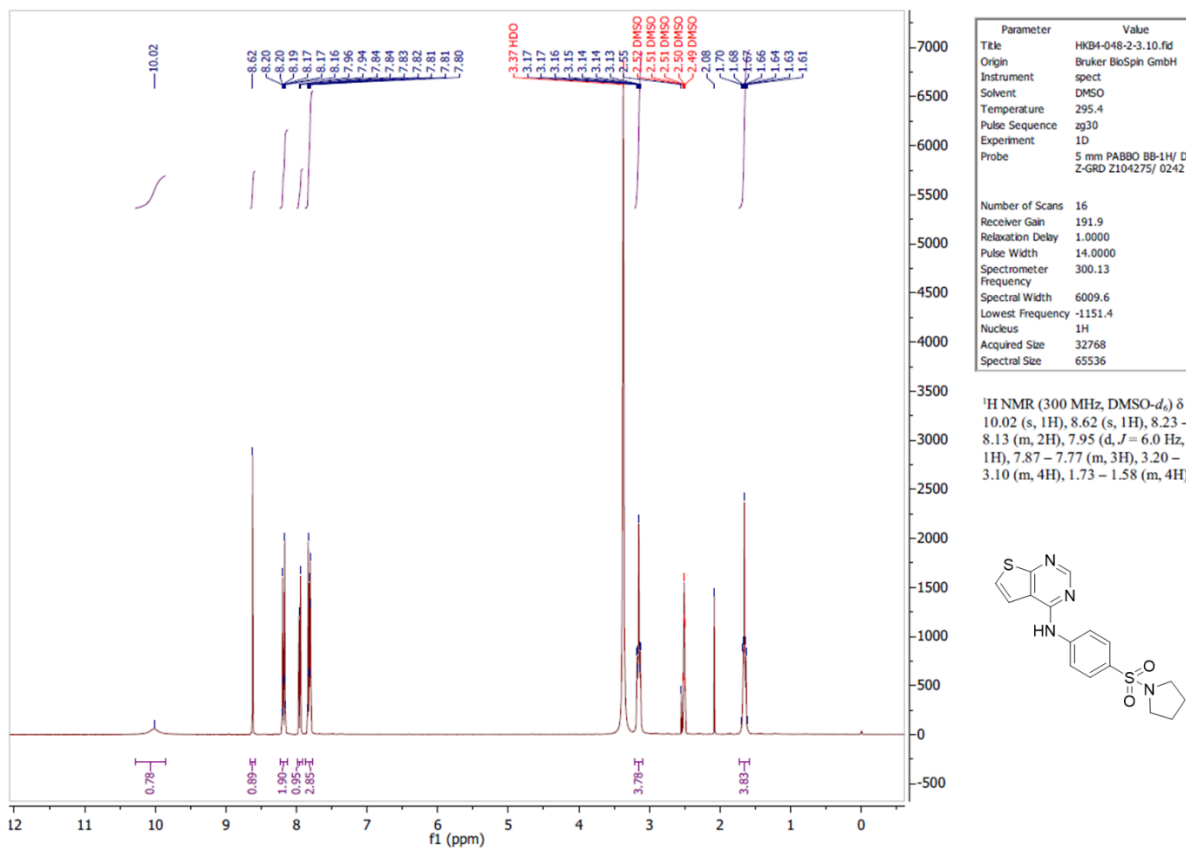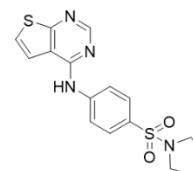

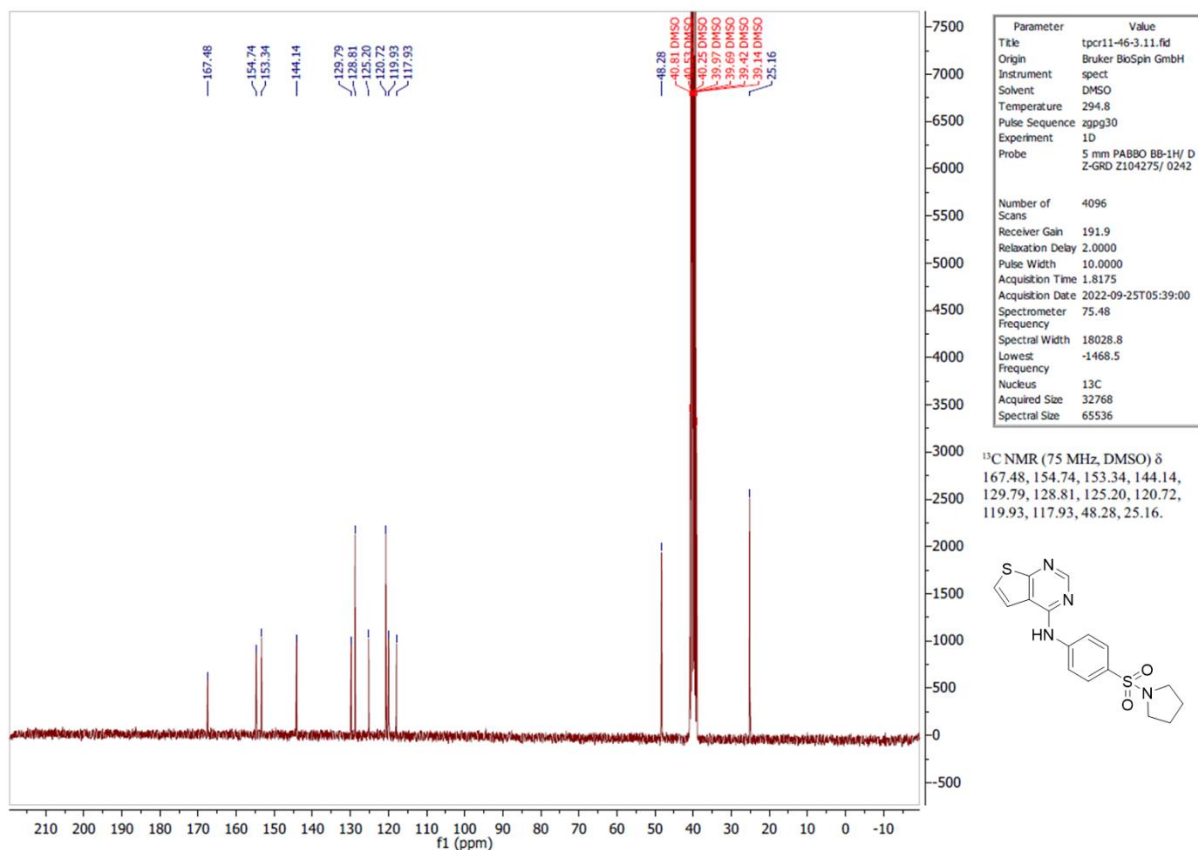

Compound 36

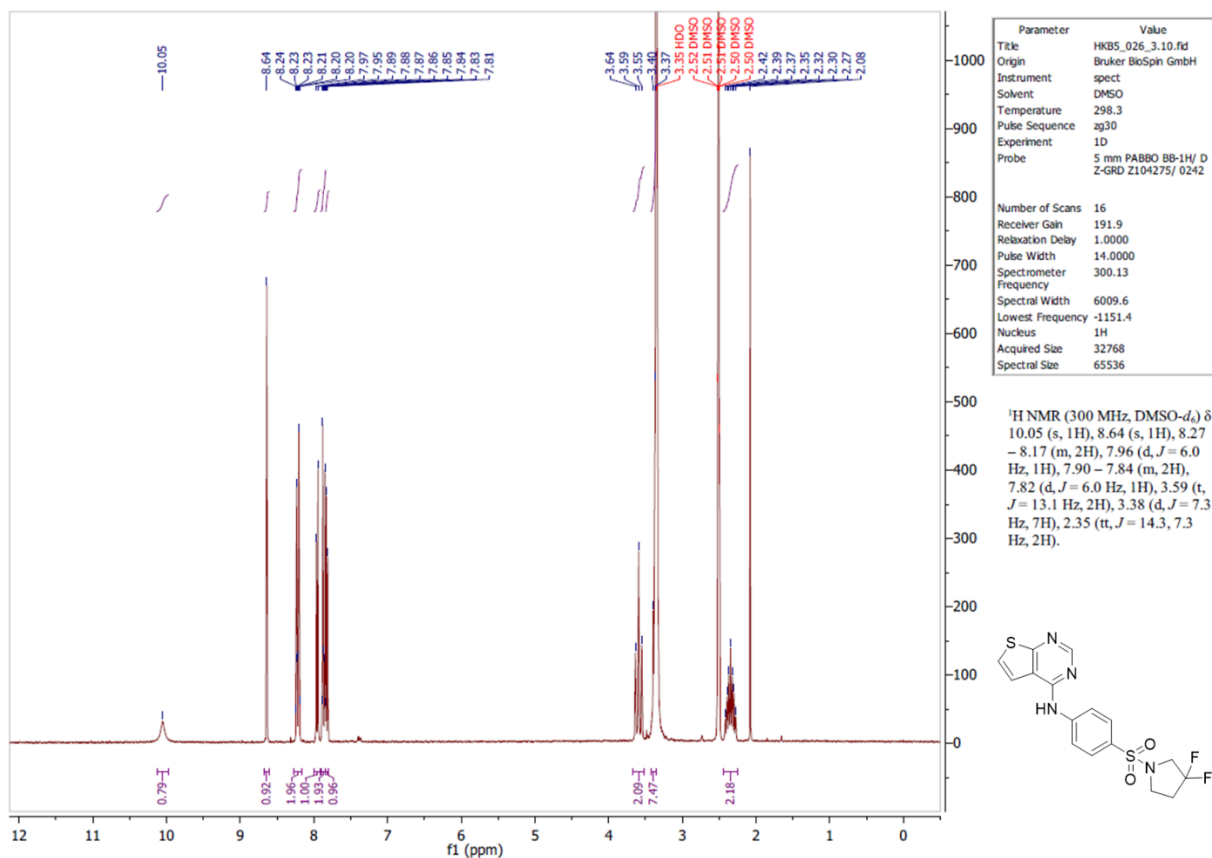

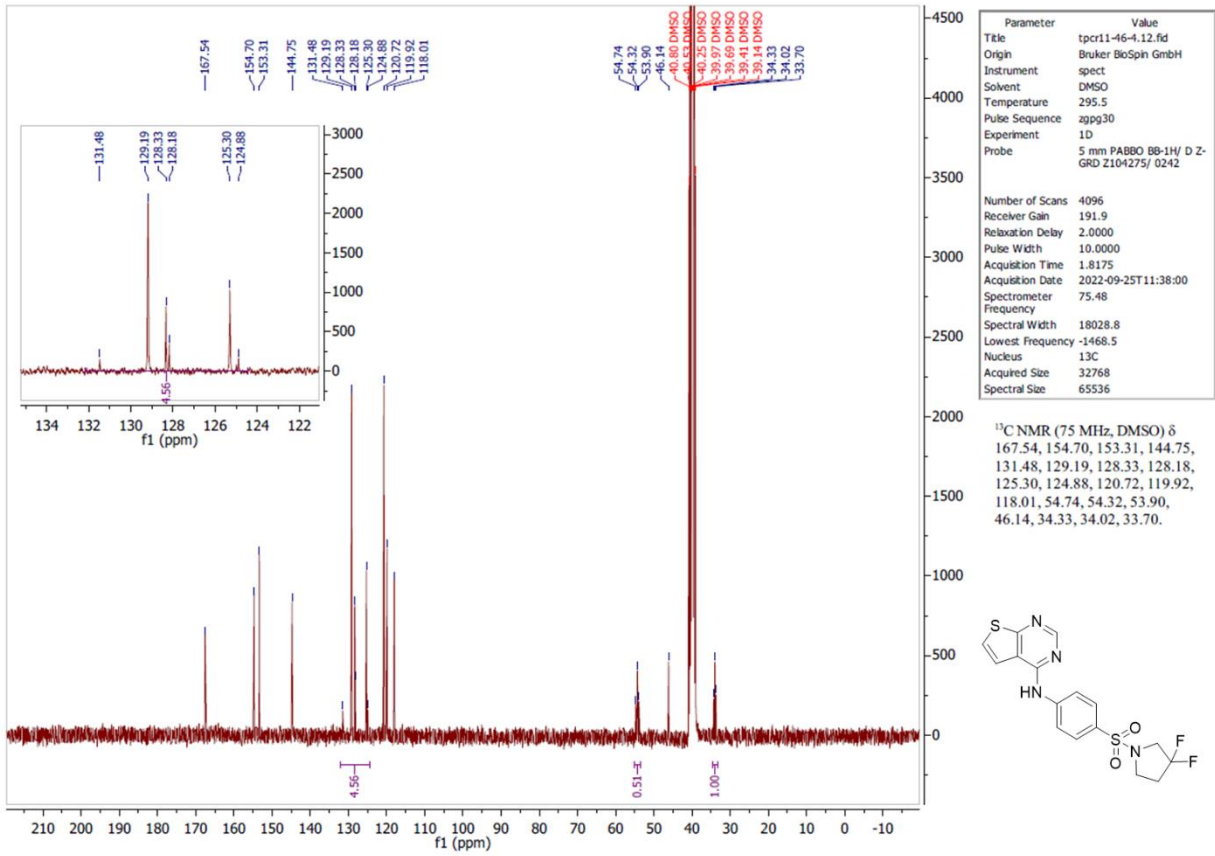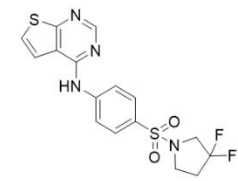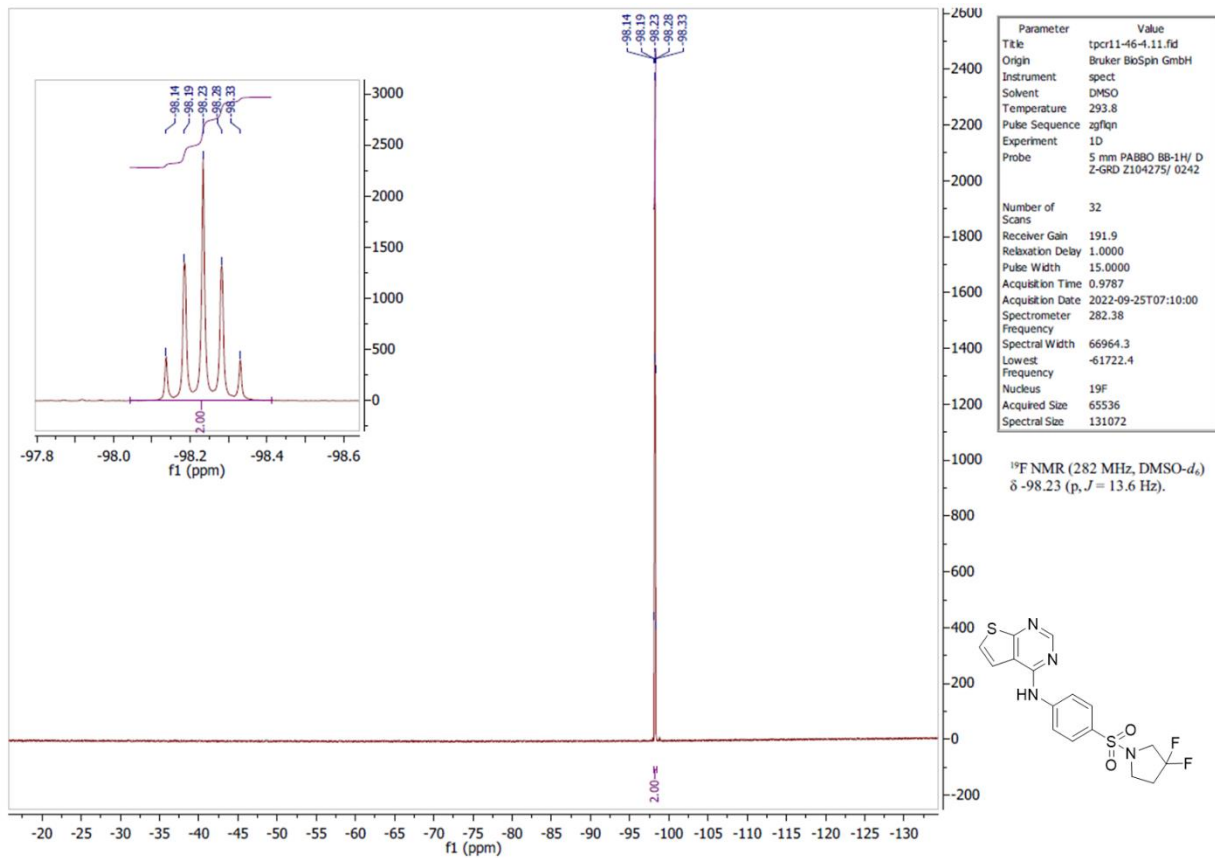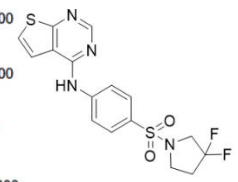

Compound 37

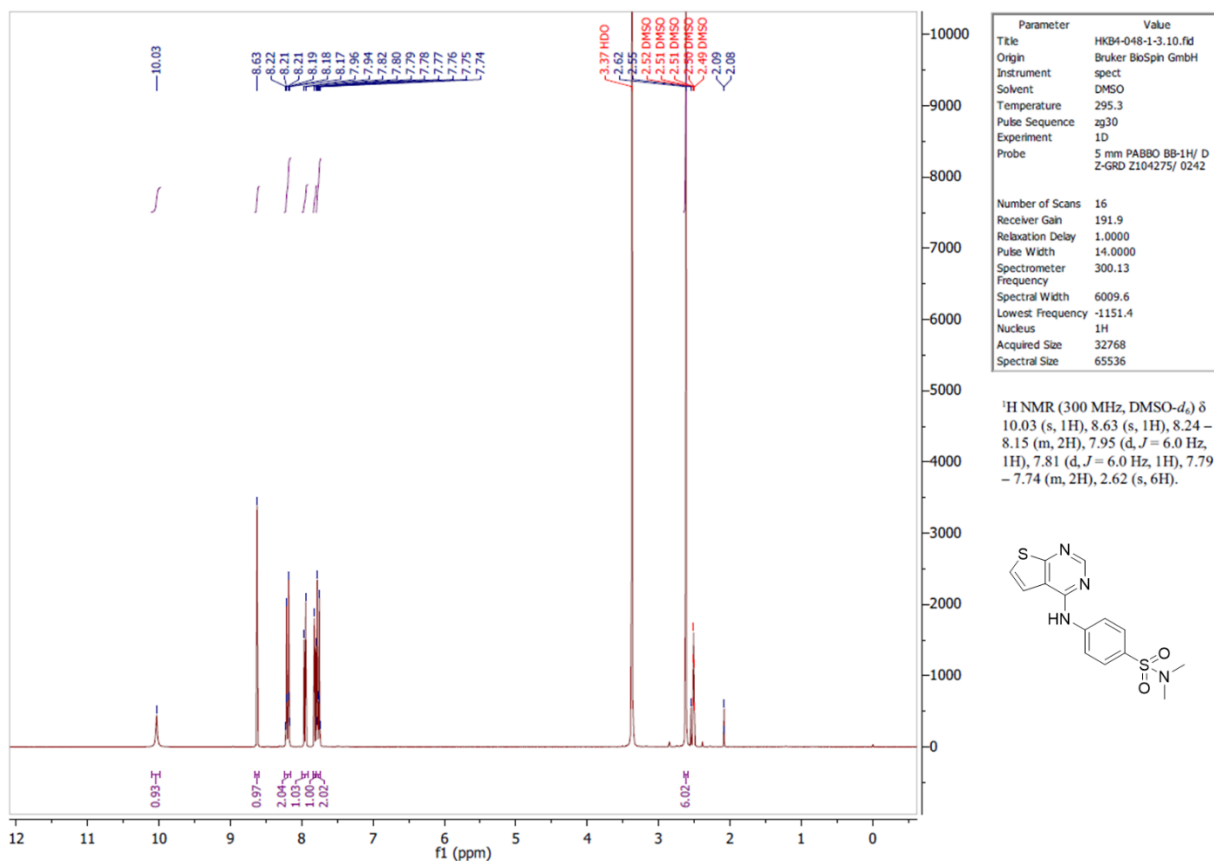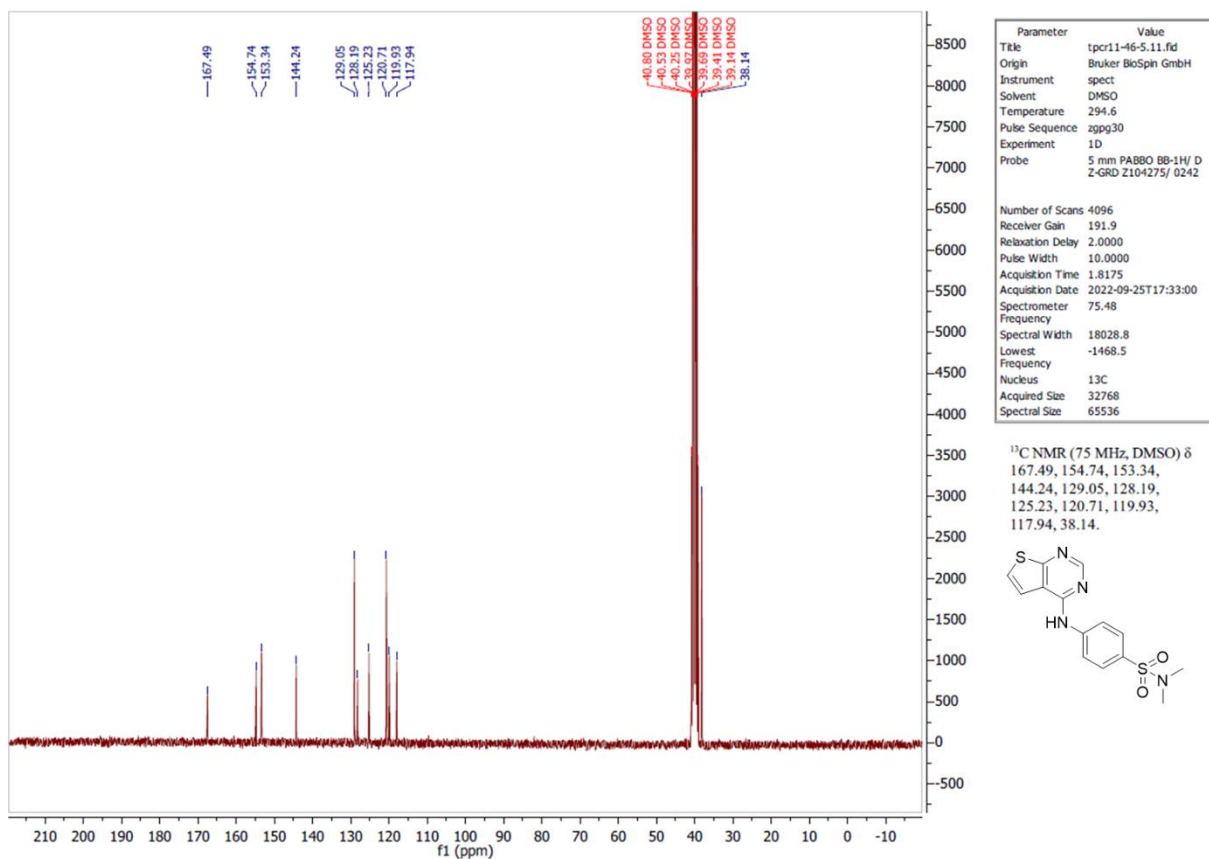

Compound 38

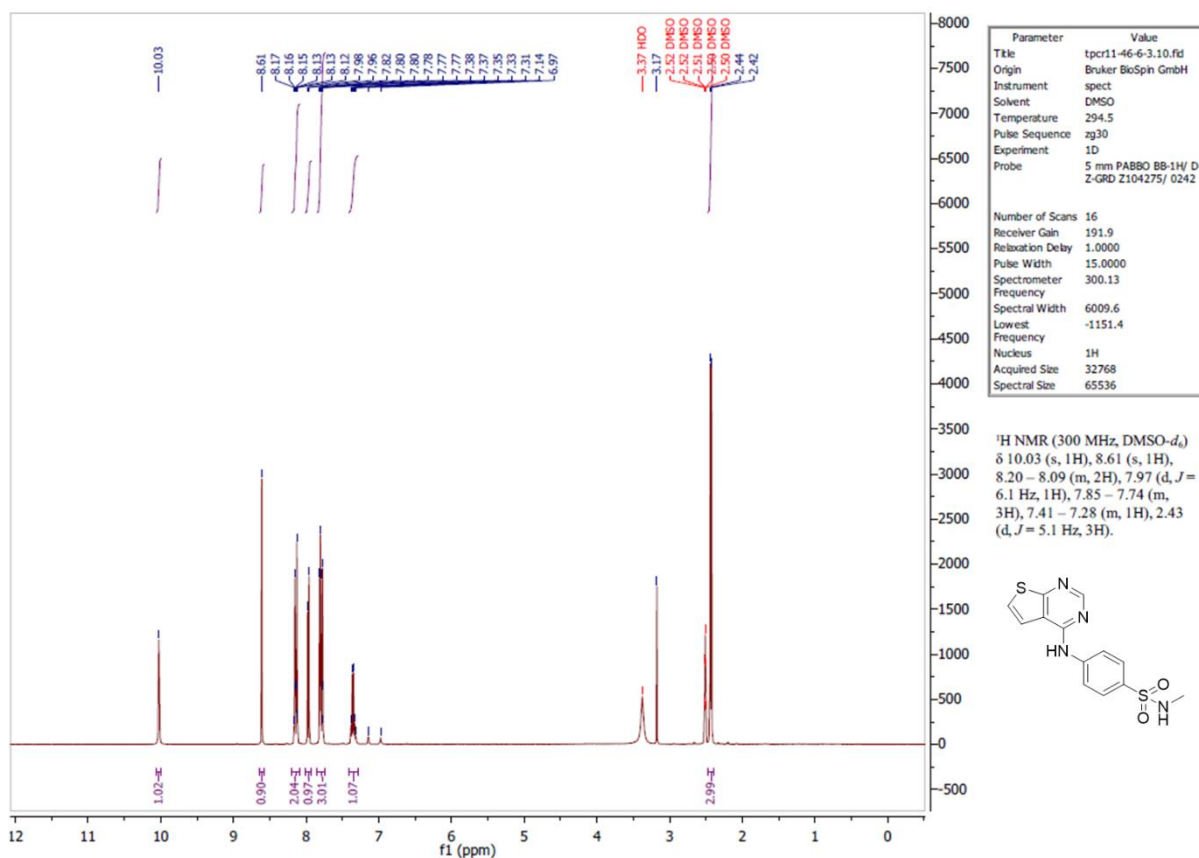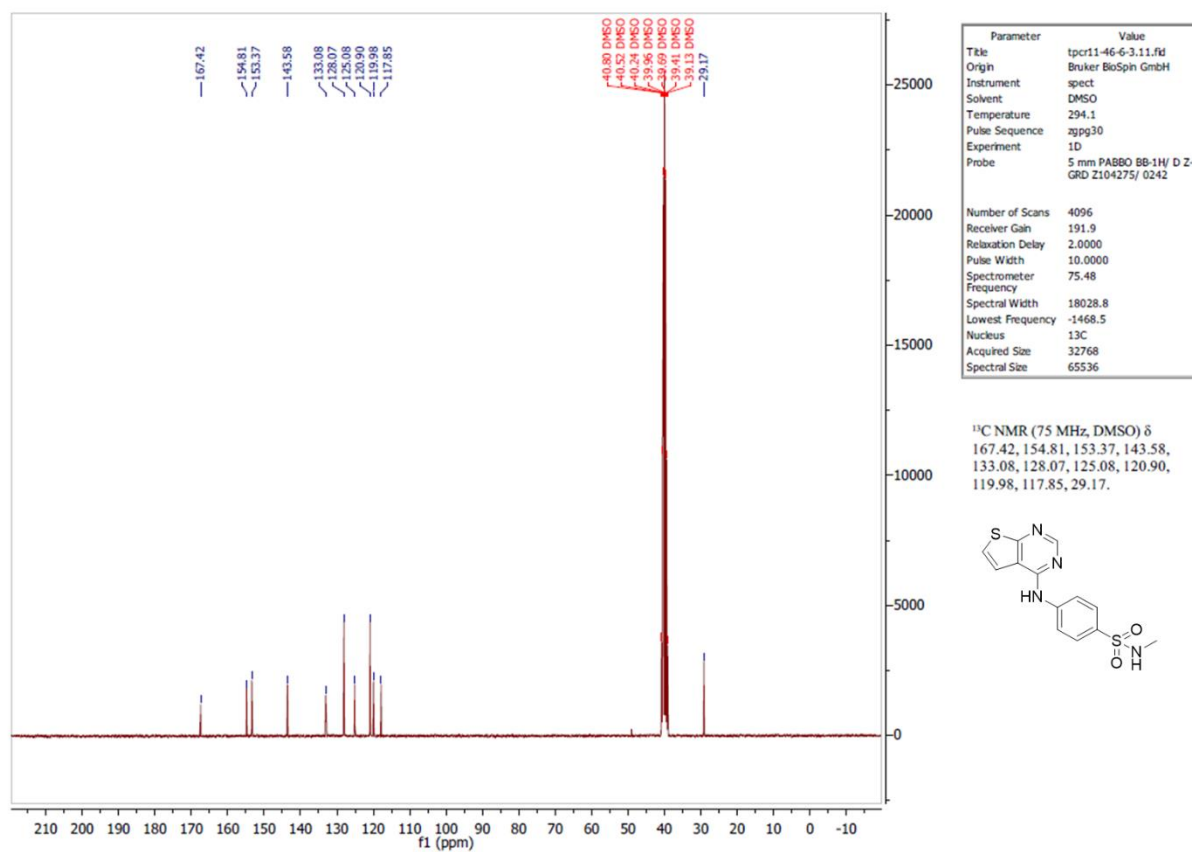

Compound 40

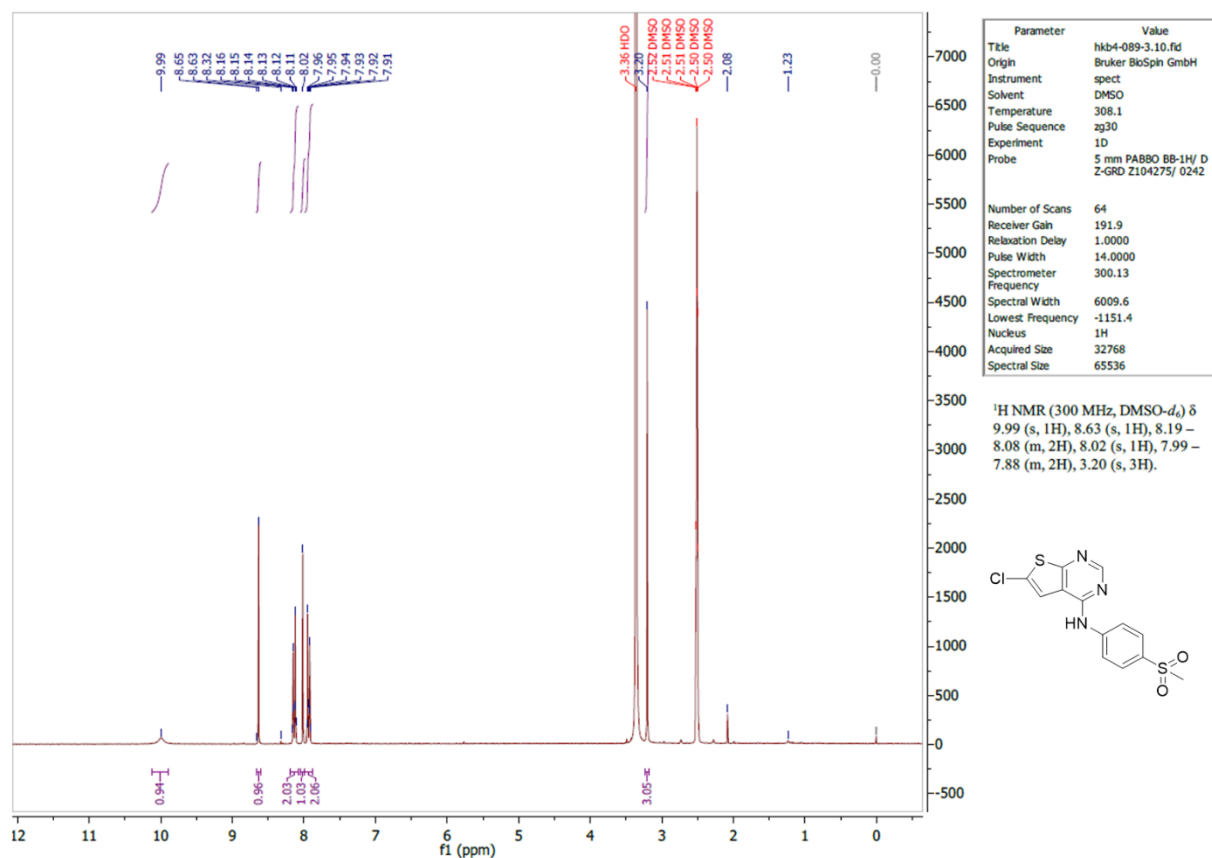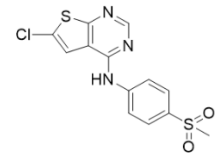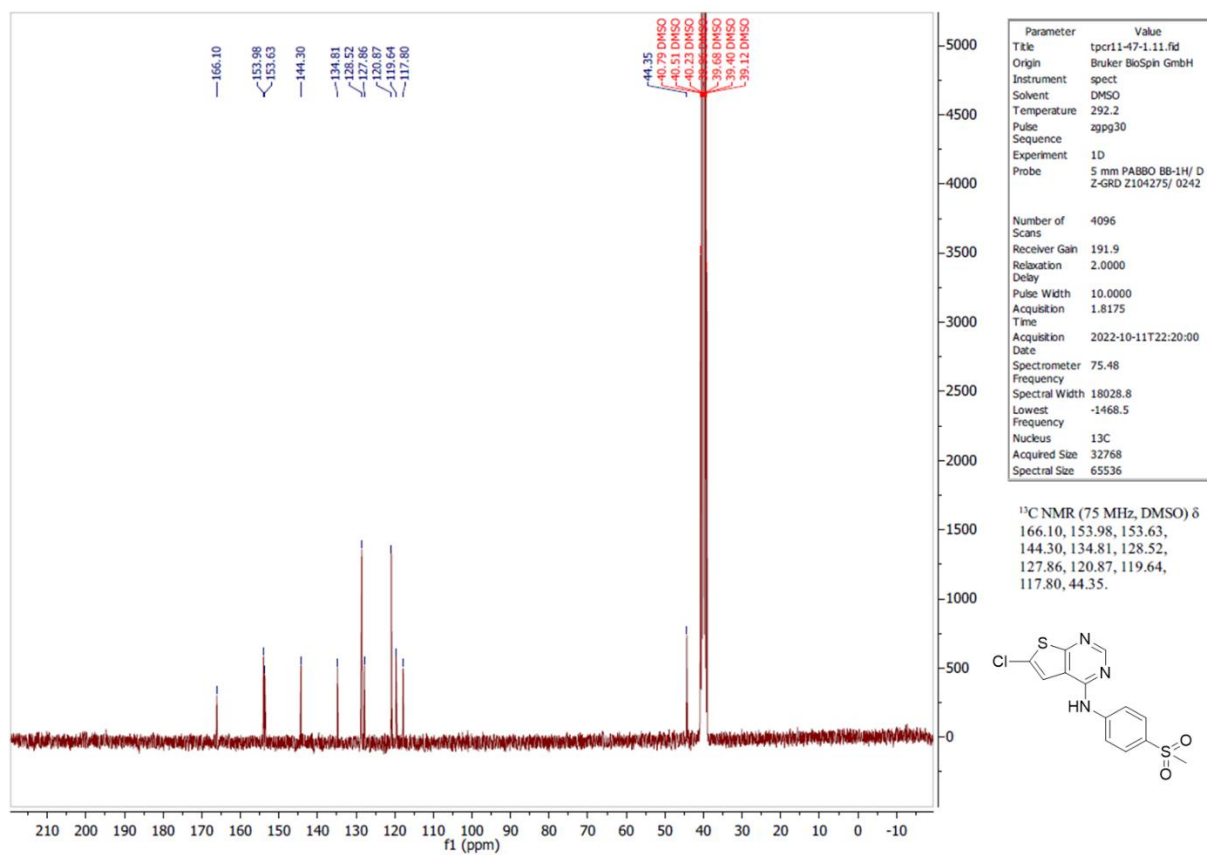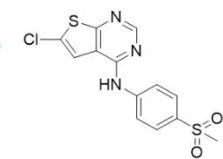



Compound **41**: (Insufficient material for  $^{13}\text{C}$  spectrum)

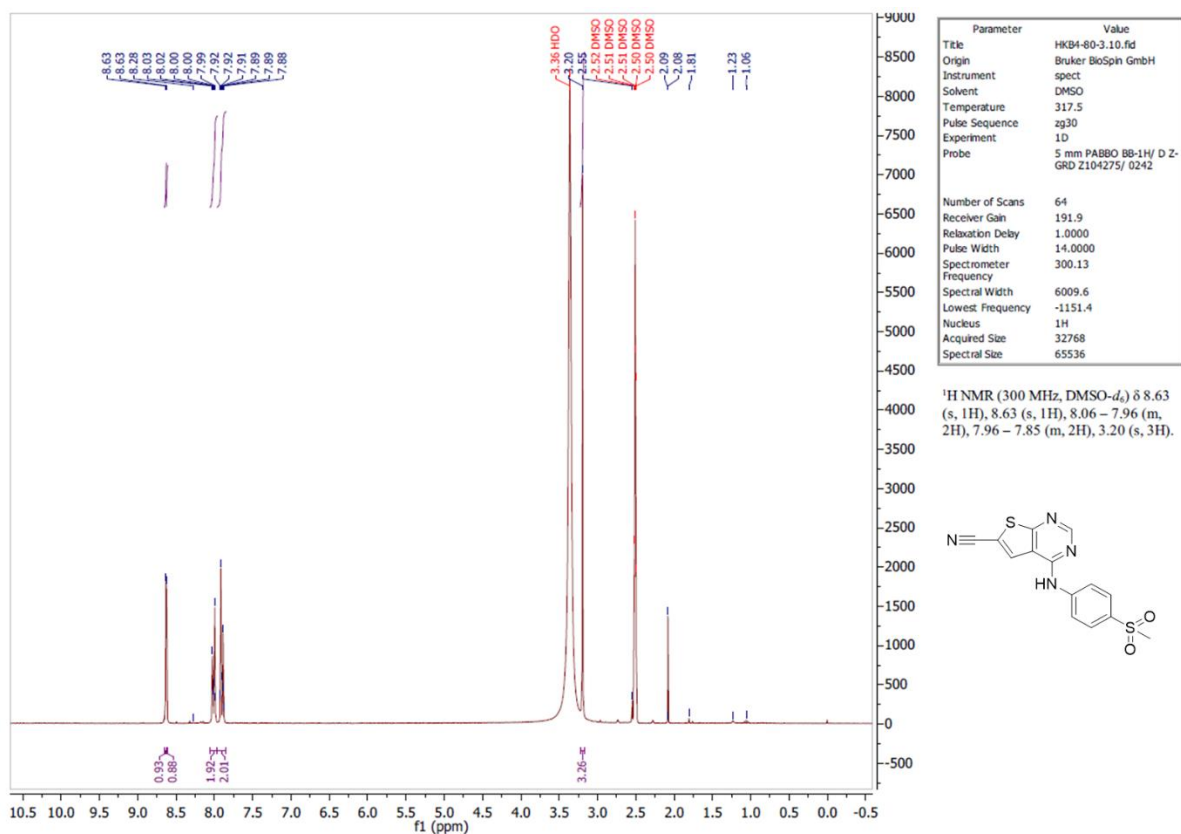

Compound **42**

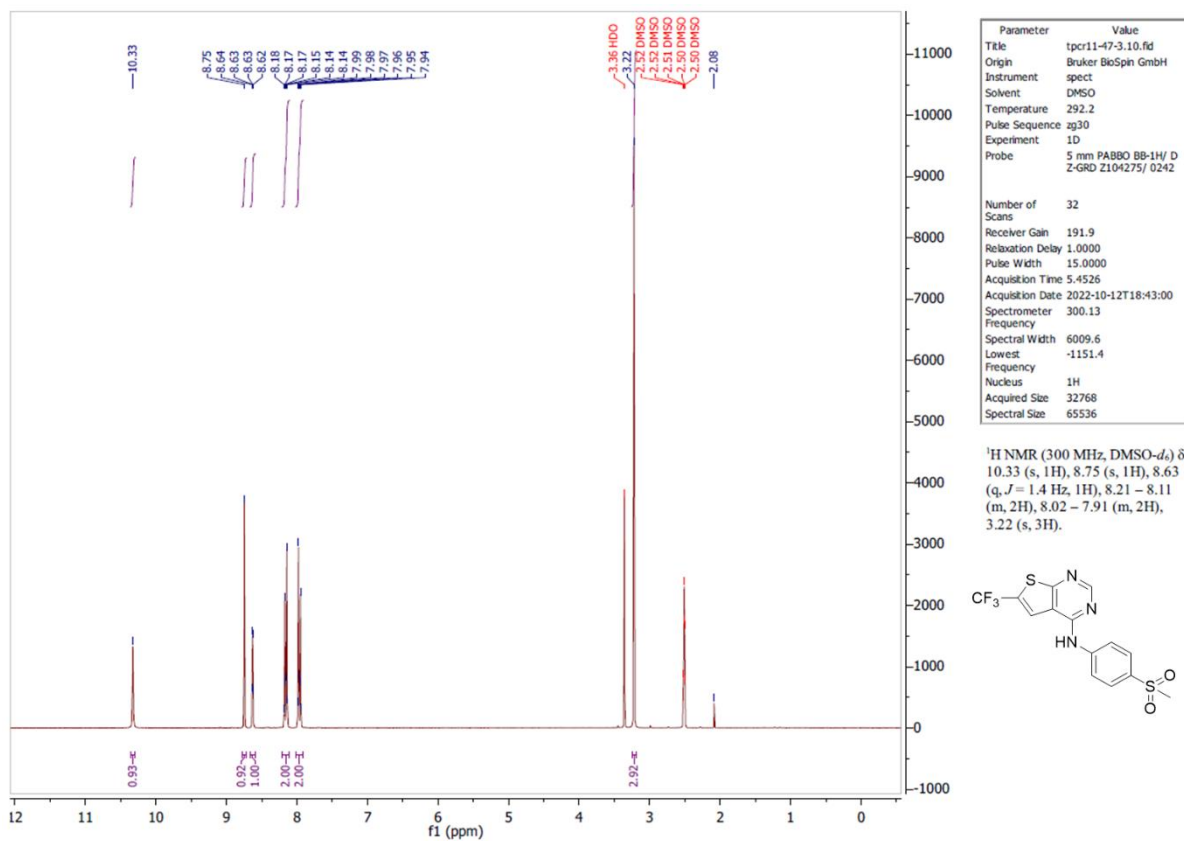

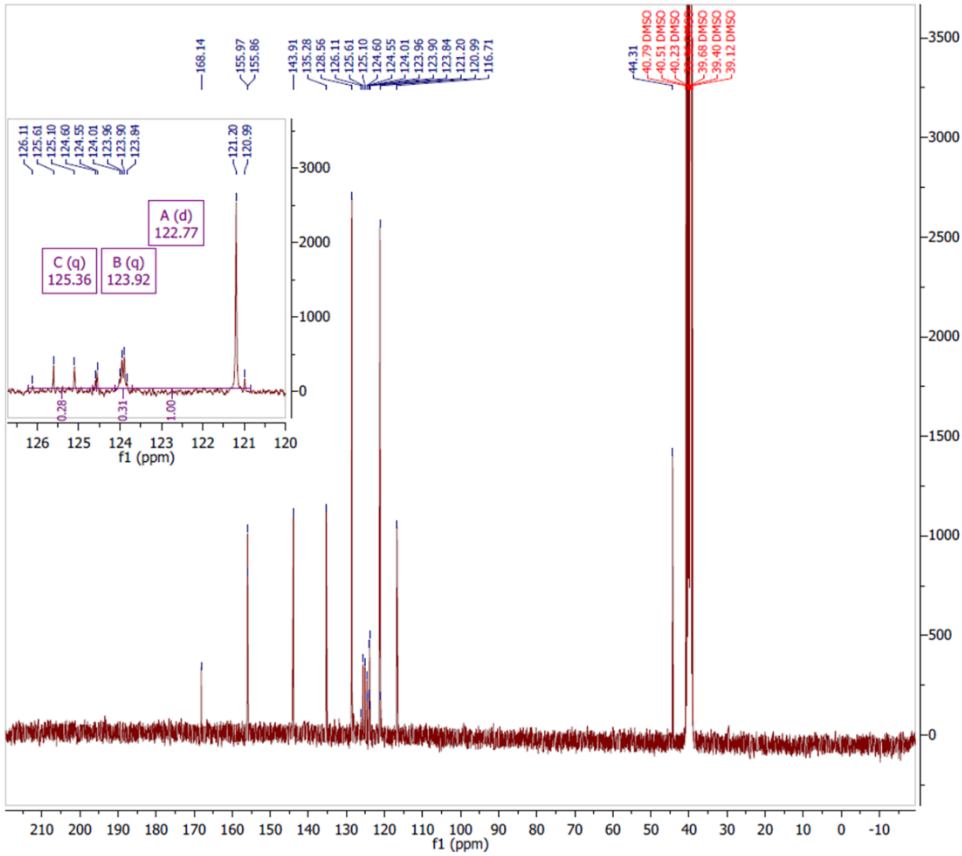

| Parameter        | Value                                   |
|------------------|-----------------------------------------|
| Title            | tpr11-47-3.11.fid                       |
| Origin           | Bruker BioSpin GmbH                     |
| Instrument       | spect                                   |
| Solvent          | DMSO                                    |
| Temperature      | 293.0                                   |
| Pulse Sequence   | zgpg30                                  |
| Experiment       | 1D                                      |
| Probe            | 5 mm PABBO BB-1H/ D Z-GRD Z104275/ 0242 |
| Number of Scans  | 4096                                    |
| Receiver Gain    | 191.9                                   |
| Relaxation Delay | 2.0000                                  |
| Pulse Width      | 10.0000                                 |
| Acquisition Time | 1.8175                                  |
| Acquisition Date | 2022-10-12T21:10:00                     |
| Spectrometer     | 75.48                                   |
| Frequency        |                                         |
| Spectral Width   | 18028.8                                 |
| Lowest Frequency | -1468.5                                 |
| Nucleus          | 13C                                     |
| Acquired Size    | 32768                                   |
| Spectral Size    | 65536                                   |

<sup>13</sup>C NMR (75 MHz, DMSO)  $\delta$   
 168.14, 155.97, 155.86, 143.91, 138.28, 128.56, 126.11, 125.61, 125.10, 124.60, 124.55, 124.01, 123.96, 123.90, 123.84, 121.20, 120.99, 116.71, 44.31.

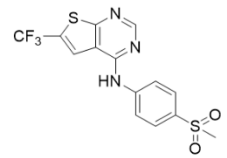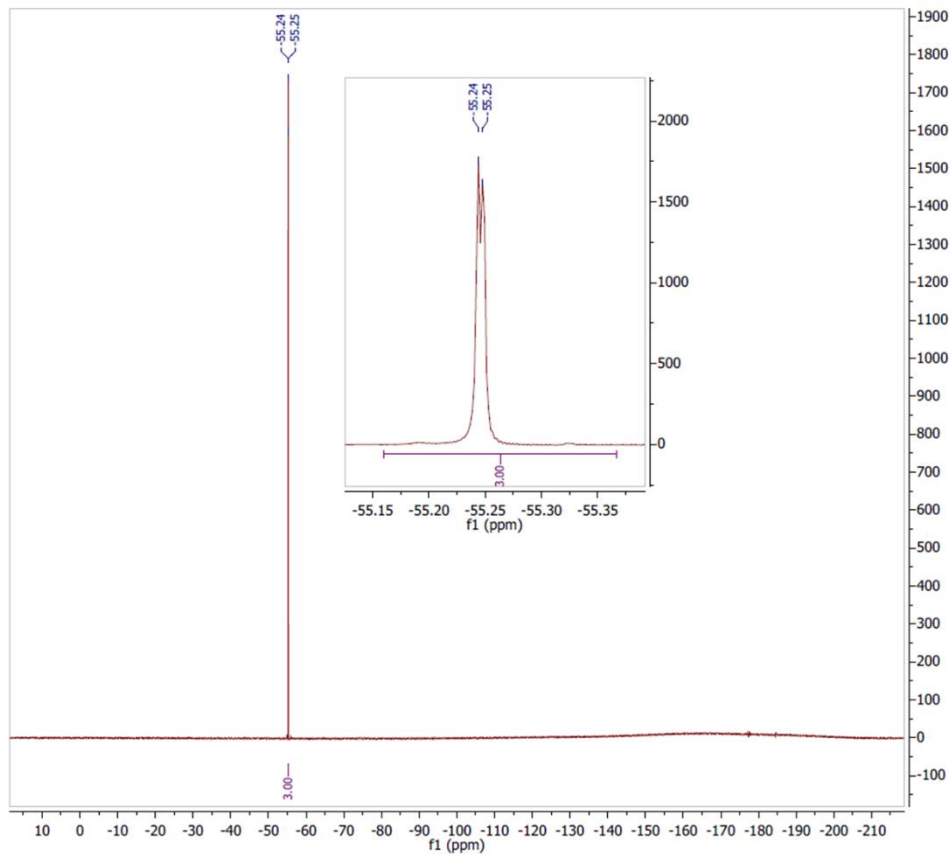

| Parameter        | Value                                   |
|------------------|-----------------------------------------|
| Title            | GGA2-54-1.11.fid                        |
| Origin           | Bruker BioSpin GmbH                     |
| Instrument       | spect                                   |
| Solvent          | DMSO                                    |
| Temperature      | 295.8                                   |
| Pulse Sequence   | zgfgqn                                  |
| Experiment       | 1D                                      |
| Probe            | 5 mm PABBO BB-1H/ D Z-GRD Z104275/ 0242 |
| Number of Scans  | 16                                      |
| Receiver Gain    | 191.9                                   |
| Relaxation Delay | 1.0000                                  |
| Pulse Width      | 15.0000                                 |
| Spectrometer     | 282.38                                  |
| Frequency        |                                         |
| Spectral Width   | 66964.3                                 |
| Lowest Frequency | -61722.4                                |
| Nucleus          | 19F                                     |
| Acquired Size    | 65536                                   |
| Spectral Size    | 131072                                  |

<sup>19</sup>F NMR (282 MHz, DMSO-*d*<sub>6</sub>)  $\delta$   
 -55.25 (d,  $J = 1.1$  Hz).

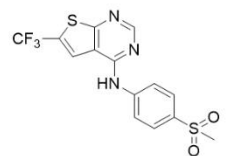



Compound 43

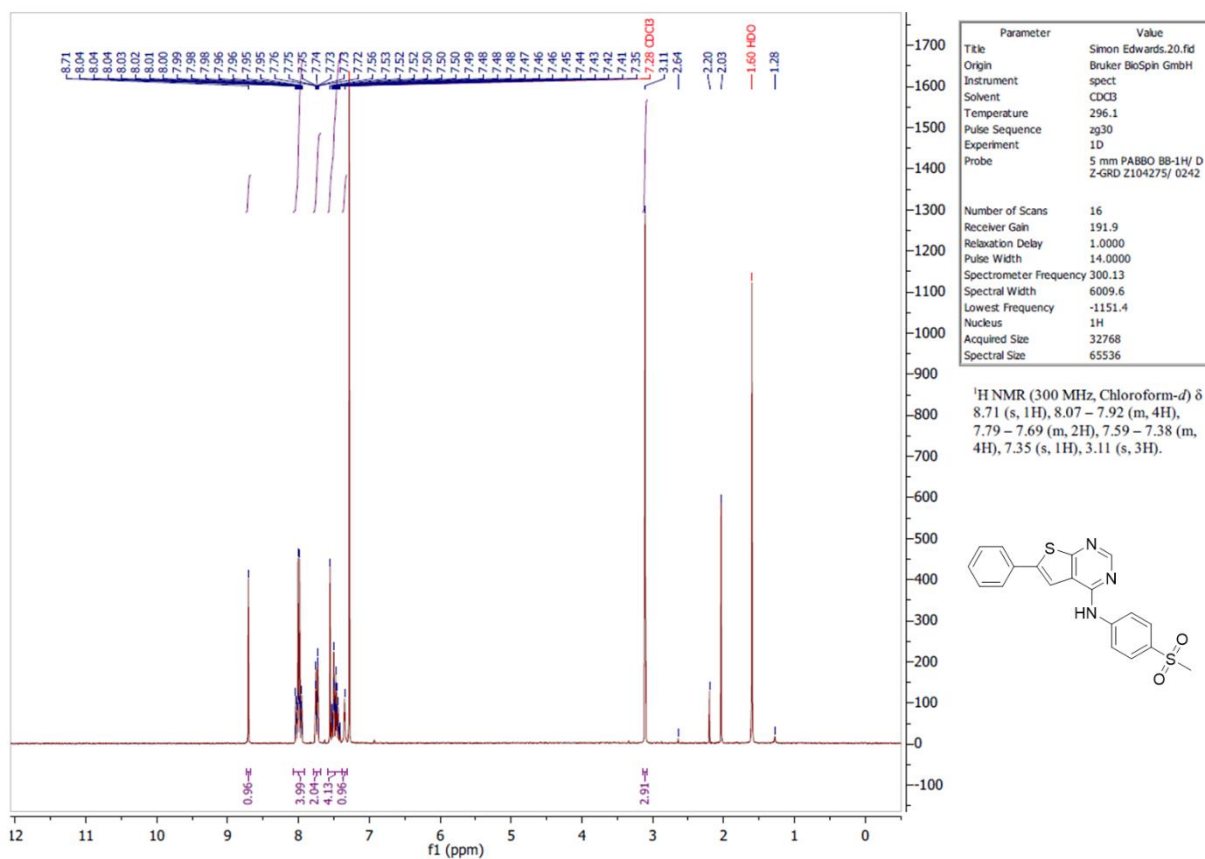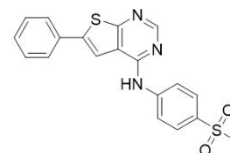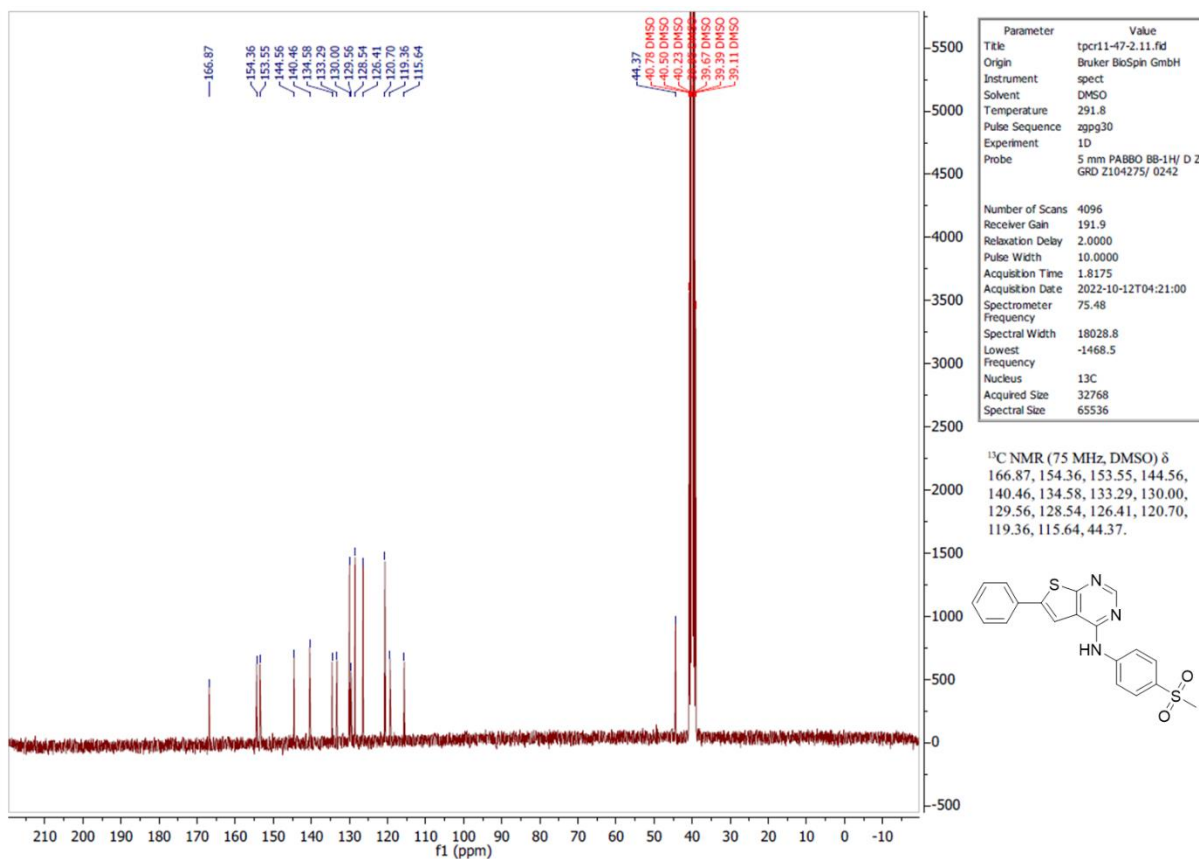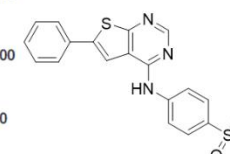

# HPLC traces of compounds from Table 6

## Compound 1

Openlynx Report Page 1  
 File:DDI\_HClass\_0003941  
 Method:C:\MassLynx\lib\_acidic\_QC01.olp

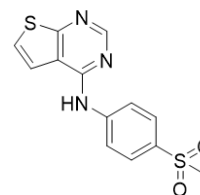

Exact Mass: 305.0

### Sample Report:

Column Name ACQUITY UPLC® HSS C18 1.8µm

3: UV Detector: TAC: Wavelength Range: (210 - 400) Smooth (SG, 1x1)

3.465e+2

Range: 3.585e+2

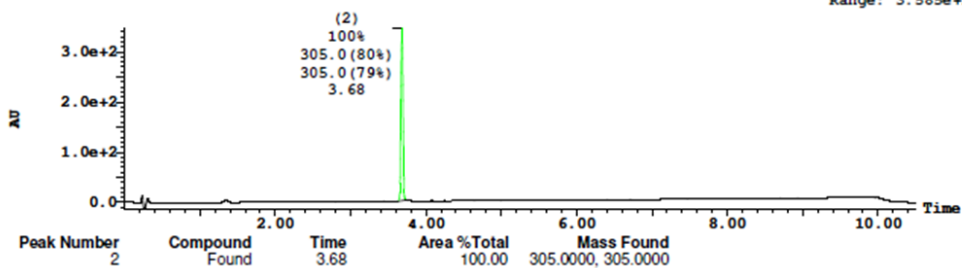

| Peak ID | Compound | Time | Mass Found |
|---------|----------|------|------------|
| 2       | Found    | 3.69 | 306        |

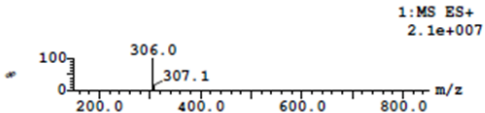

| Peak ID | Compound | Time | Mass Found |
|---------|----------|------|------------|
| 2       | Found    | 3.69 | 304        |

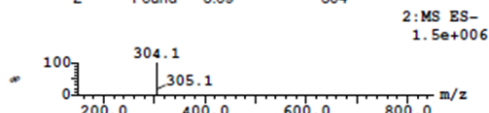

## Compound 7

Openlynx Report Page 1  
 File:DDI\_HClass\_0027314  
 Method:C:\MassLynx\lib\_basico\_QC11.olp

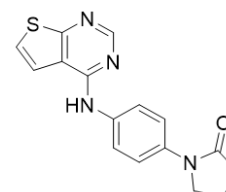

Exact Mass: 310.1

### Sample Report:

Column Name ACQUITY UPLC® BEH C18 1.7µm

3: UV Detector: TAC: Wavelength Range: (210 - 400) Smooth (SG, 1x1)

2.867e+2

Range: 2.886e+2

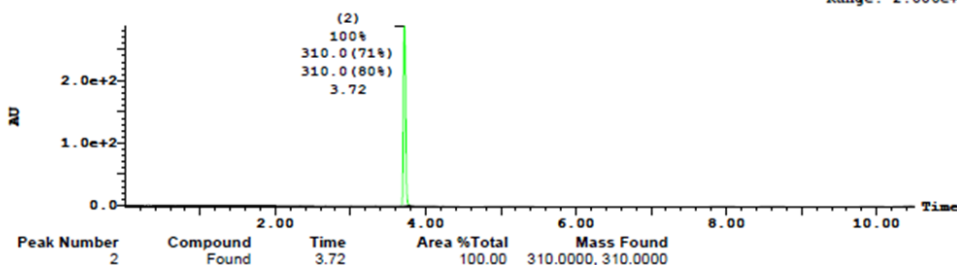

| Peak ID | Compound | Time | Mass Found |
|---------|----------|------|------------|
| 2       | Found    | 3.70 | 333,311    |

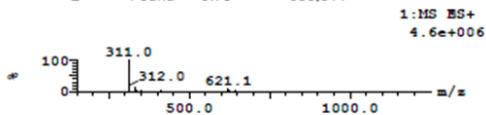

| Peak ID | Compound | Time | Mass Found |
|---------|----------|------|------------|
| 2       | Found    | 3.70 | 309        |

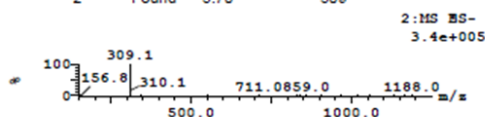

## Compound 15

Openlynx Report  
 File:DDI\_HClass\_0005444  
 Method:C:\MassLynx\lb\_basic\_QC03.olp

Page 1

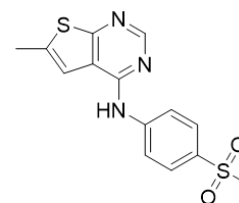

Exact Mass: 319.0

### Sample Report:

Column Name ACQUITY UPLC® BEH C18 1.7µm

3: UV Detector: TAC: Wavelength Range: (210 - 400) Smooth (SG, 1x1)

1.236e+2  
 Range: 1.246e+2

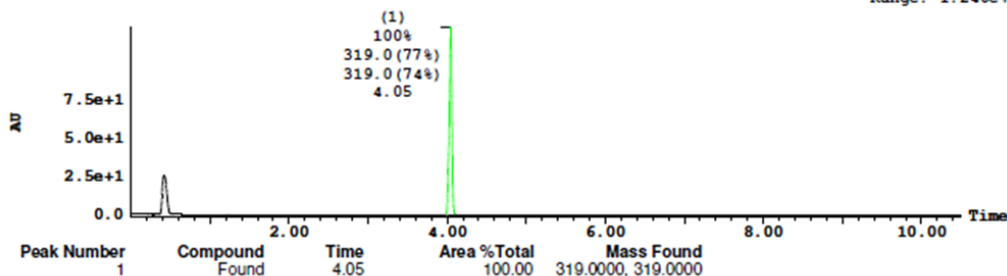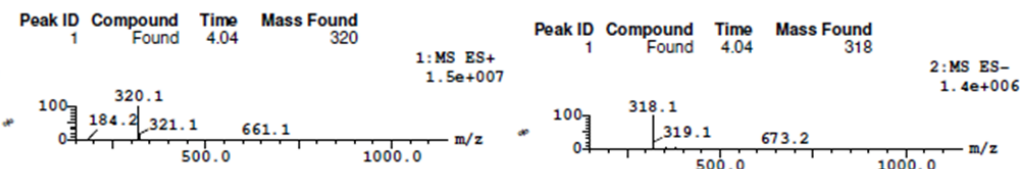

## Compound 23

Openlynx Report  
 File:DDI\_HClass\_0004608  
 Method:C:\MassLynx\lb\_basic\_QC03.olp

Page 1

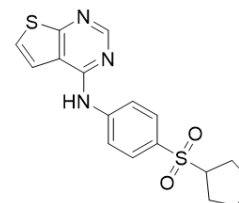

Exact Mass: 359.1

### Sample Report:

Column Name ACQUITY UPLC® BEH C18 1.7µm

3: UV Detector: TAC: Wavelength Range: (210 - 400) Smooth (SG, 1x1)

3.279e+2  
 Range: 3.29e+2

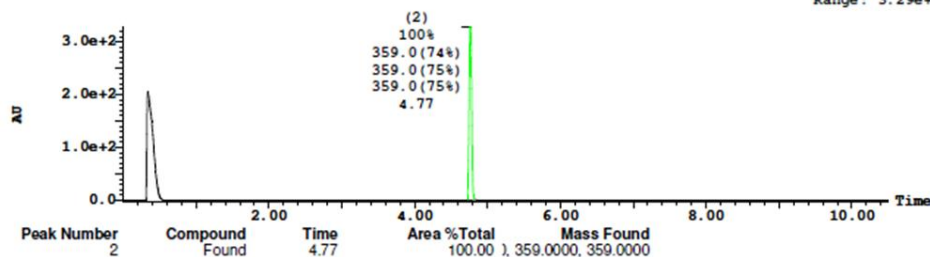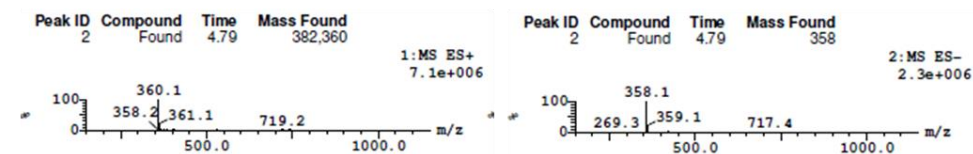

## Compound 24

Openlynx Report  
 File:DDI\_HClass\_0004593  
 Method:C:\MassLynx\basic\_QC03.olb

Page 1

### Sample Report:

Column Name ACQUITY UPLC® BEH C18 1.7µm

3: UV Detector: TAC: Wavelength Range: (210 - 400) Smooth (SG, 1x1)

2.517e+2  
 Range: 2.53e+2

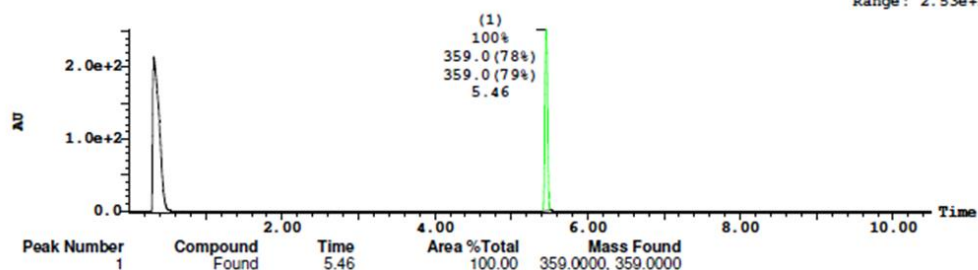

| Peak ID | Compound | Time | Mass Found |
|---------|----------|------|------------|
| 1       | Found    | 5.45 | 360        |

1: MS ES+  
 1.3e+007

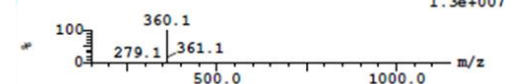

| Peak ID | Compound | Time | Mass Found |
|---------|----------|------|------------|
| 1       | Found    | 5.45 | 358        |

2: MS ES-  
 6.9e+006

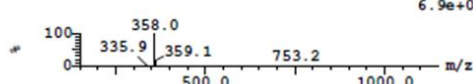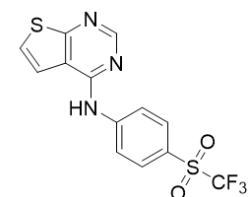

Exact Mass: 359.0

## Compound 35

Openlynx Report  
 File:DDI\_HClass\_0007535  
 Method:C:\MassLynx\basic\_QC05.olb

Page 1

### Sample Report:

Column Name ACQUITY UPLC® BEH C18 1.7µm

3: UV Detector: TAC: Wavelength Range: (210 - 400) Smooth (SG, 1x1)

6.012e+1  
 Range: 6.045e+1

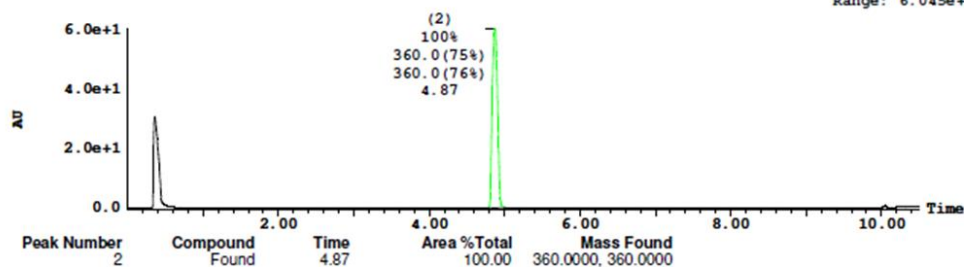

| Peak ID | Compound | Time | Mass Found |
|---------|----------|------|------------|
| 2       | Found    | 4.86 | 383,361    |

1: MS ES+  
 1.3e+006

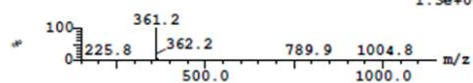

| Peak ID | Compound | Time | Mass Found |
|---------|----------|------|------------|
| 2       | Found    | 4.86 | 359        |

2: MS ES-  
 3.8e+005

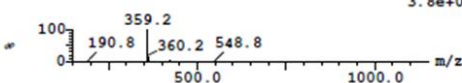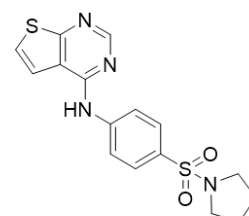

Exact Mass: 360.1

## Compound 36

Openlynx Report  
 File:DDI\_HClass\_0010002  
 Method:C:\MassLynx\basic\_QC07.0lp

Page 1

### Sample Report:

Column Name ACQUITY UPLC® BEH C18 1.7µm

3: UV Detector: TAC: Wavelength Range: (210 - 400) Smooth (SG, 1x1) 2.918e+2  
 Range: 2.922e+2

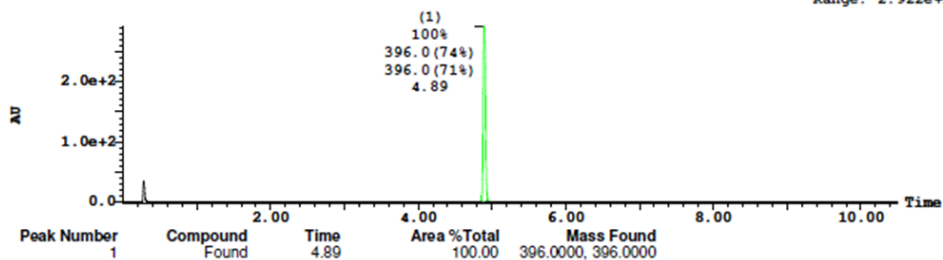

| Peak ID | Compound Found | Time | Mass Found |
|---------|----------------|------|------------|
| 1       | Found          | 4.87 | 397        |

1: MS ES+  
1.2e+006

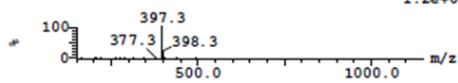

| Peak ID | Compound Found | Time | Mass Found |
|---------|----------------|------|------------|
| 1       | Found          | 4.87 | 395        |

2: MS ES-  
1.2e+006

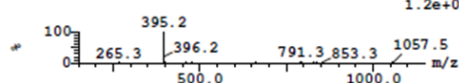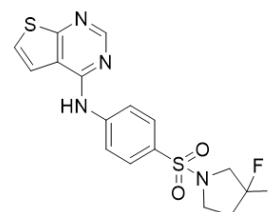

Exact Mass: 396.1

## Compound 37

Openlynx Report  
 File:DDI\_HClass\_0007534  
 Method:C:\MassLynx\basic\_QC05.0lp

Page 1

### Sample Report:

Column Name ACQUITY UPLC® BEH C18 1.7µm

3: UV Detector: TAC: Wavelength Range: (210 - 400) Smooth (SG, 1x1) 7.781e+1  
 Range: 7.806e+1

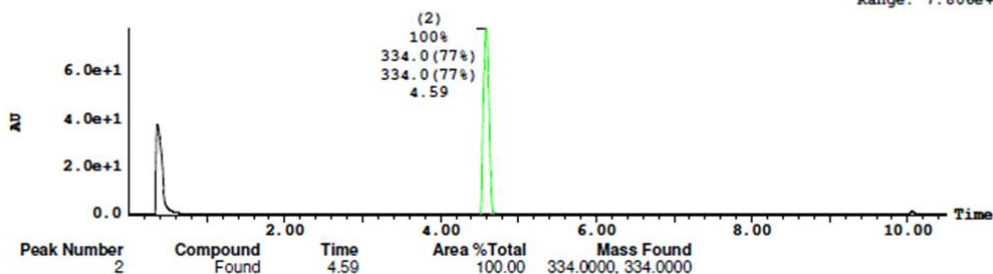

| Peak ID | Compound Found | Time | Mass Found |
|---------|----------------|------|------------|
| 2       | Found          | 4.59 | 335        |

1: MS ES+  
2.3e+006

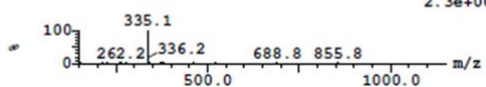

| Peak ID | Compound Found | Time | Mass Found |
|---------|----------------|------|------------|
| 2       | Found          | 4.59 | 333        |

2: MS ES-  
7.8e+005

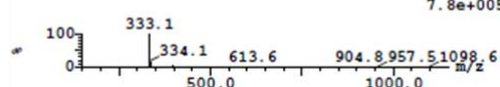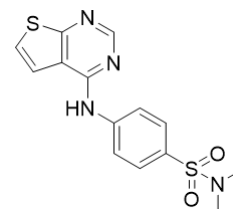

Exact Mass: 334.1

## Compound 38

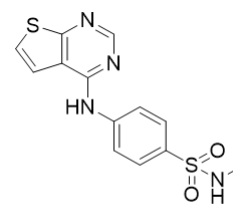

Exact Mass: 320.0

Sample Report:

Column Name ACQUITY UPLC® BEH C18 1.7µm

3: UV Detector: TAC: Wavelength Range: (210 - 400) Smooth (SG, 1x1)

2.365e+2  
Range: 2.369e+2

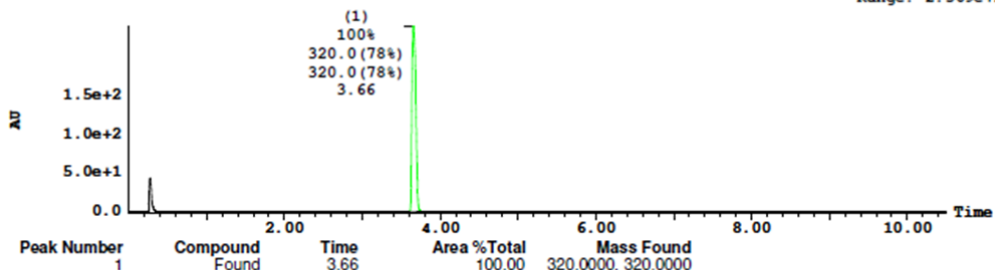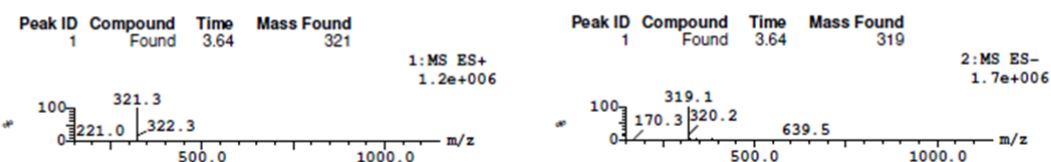

Compound 40

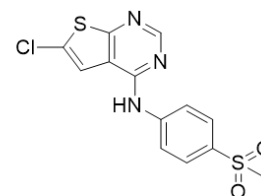

Exact Mass: 339.0

Sample Report:

Column Name ACQUITY UPLC® HSS C18 1.8µm

3: UV Detector: TAC: Wavelength Range: (230 - 400) Smooth (SG, 1x1)

1.996e+2  
Range: 2.002e+2

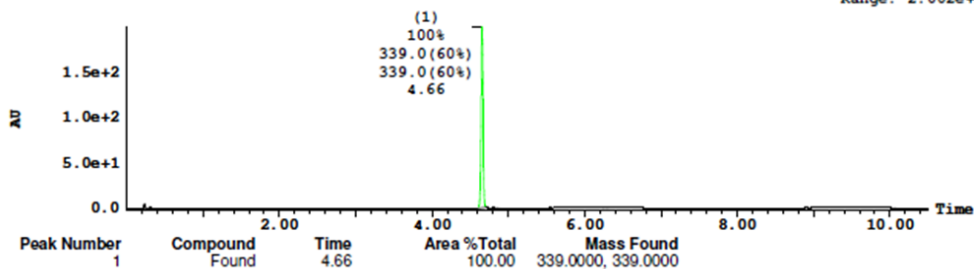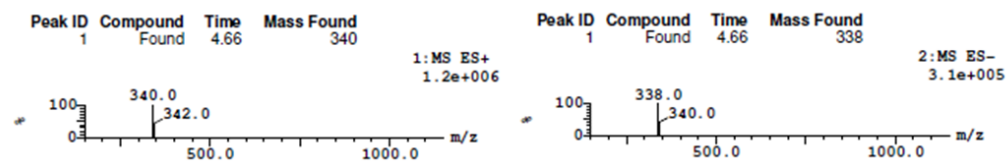

Compound 41

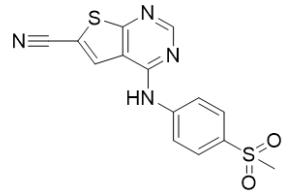

Exact Mass: 330.0

Sample Report:

Column Name ACQUITY UPLC® BEH C18 1.7µm

3: UV Detector: TAC: Wavelength Range: (210 - 400) Smooth (SG, 1x1)

1.143e+2  
 Range: 1.145e+2

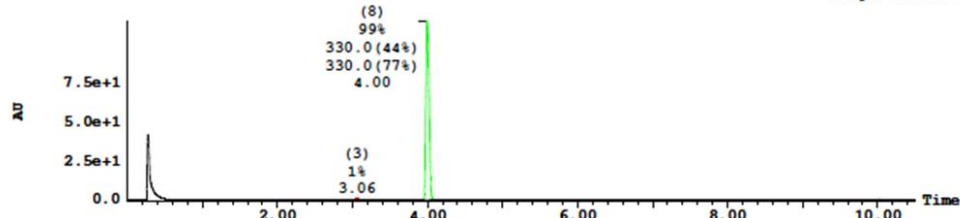

| Peak Number | Compound | Time | Area %Total | Mass Found         |
|-------------|----------|------|-------------|--------------------|
| 3           | Found    | 3.06 | 1.00        | Not Found          |
| 8           | Found    | 4.00 | 99.00       | 330.0000, 330.0000 |

| Peak ID | Compound | Time | Mass Found |
|---------|----------|------|------------|
| 8       | Found    | 3.98 | 353,331    |

1: MS ES+  
 8.5e+003

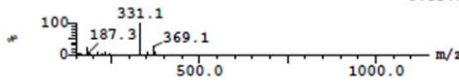

| Peak ID | Compound | Time | Mass Found |
|---------|----------|------|------------|
| 8       | Found    | 3.98 | 329        |

2: MS ES-  
 1.1e+006

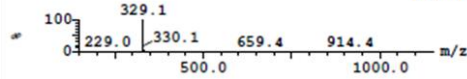

Compound 42

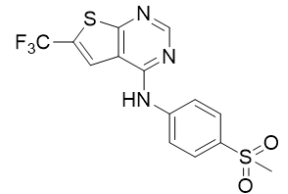

Exact Mass: 373.0

Sample Report:

Column Name ACQUITY UPLC® BEH C18 1.7µm

3: UV Detector: TAC: Wavelength Range: (210 - 400) Smooth (SG, 1x1)

4.231e+1  
 Range: 4.264e+1

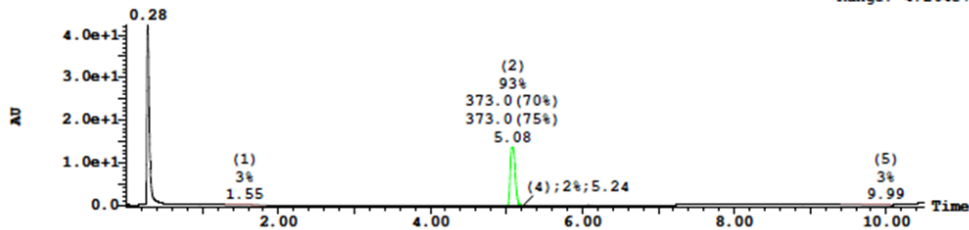

| Peak Number | Compound | Time | Area %Total | Mass Found         |
|-------------|----------|------|-------------|--------------------|
| 1           | Found    | 1.55 | 2.77        | Not Found          |
| 2           | Found    | 5.08 | 92.73       | 373.0000, 373.0000 |
| 4           | Found    | 5.24 | 1.52        | Not Found          |
| 5           | Found    | 9.99 | 2.97        | Not Found          |

| Peak ID | Compound | Time | Mass Found |
|---------|----------|------|------------|
| 2       | Found    | 5.09 | 374        |

1: MS ES+  
 5.6e+005

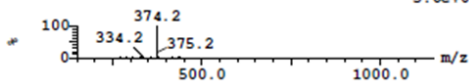

| Peak ID | Compound | Time | Mass Found |
|---------|----------|------|------------|
| 2       | Found    | 5.09 | 372        |

2: MS ES-  
 3.7e+006

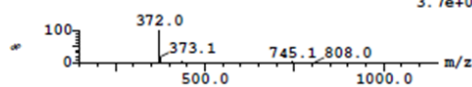

Compound 43



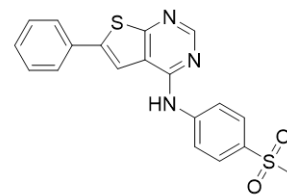

Exact Mass: 381.1

Sample Report:

Column Name ACQUITY UPLC® BEH C18 1.7µm

3: UV Detector: TAC: Wavelength Range: (210 - 400) Smooth (SG, 1x1)

2.011e+2

Range: 2.024e+2

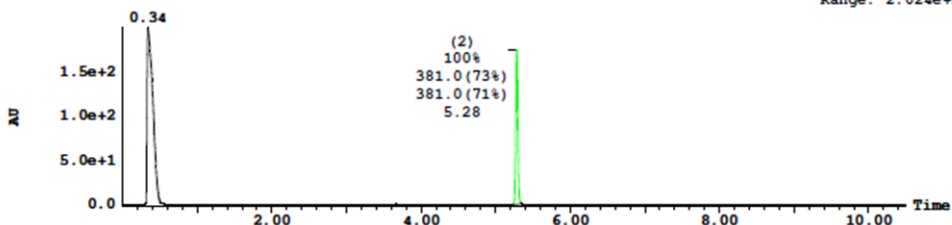

| Peak Number | Compound Found | Time | Area %Total | Mass Found         |
|-------------|----------------|------|-------------|--------------------|
| 2           | Found          | 5.28 | 100.00      | 381.0000, 381.0000 |

| Peak ID | Compound | Time | Mass Found |
|---------|----------|------|------------|
| 2       | Found    | 5.28 | 382        |

1: MS ES+  
4.7e+006

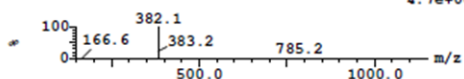

| Peak ID | Compound | Time | Mass Found |
|---------|----------|------|------------|
| 2       | Found    | 5.28 | 380        |

2: MS ES-  
1.2e+006

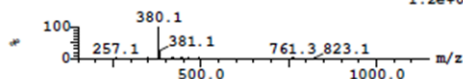

Supplement: jm2c01693_si_002.pdf [file jm2c01693_si_002.pdf]
